1 A cucumber green mottle mosaic virus vector for virus-induced  
2 gene silencing in cucurbit plants

3 Mei Liu<sup>1,2</sup>, Zhiling Liang<sup>1</sup>, Miguel A. Aranda<sup>4</sup>, Ni Hong<sup>2</sup>, Liming  
4 Liu<sup>1</sup>, Baoshan Kang<sup>1</sup>, Qinsheng Gu<sup>1,3</sup>

5 <sup>1</sup>Zhengzhou Fruit Research Institute, Chinese Academy of Agricultural  
6 Sciences, Zhengzhou 450009, P.R. China; <sup>2</sup> Huazhong Agricultural  
7 University, Wuhan 430070, P.R. China; <sup>3</sup> College of Plant Health and  
8 Medicine, The Key Laboratory of Integrated Crop Pest Management of  
9 Shandong Province, Qingdao Agricultural University, Qingdao, 266109,  
10 China. <sup>4</sup> Centro de Edafología y Biología Aplicada del Segura  
11 (CEBAS)-CSIC, Apdo. Correos 164, 30100 Espinardo, Murcia, Spain

12 <sup>1,3</sup> Corresponding author.

13 Tel: +86-371-65330997, E-mail: guqinsheng@caas.cn

14 **Author contributions:** Qinsheng Gu and Mei Liu conceived the original  
15 idea and designed the experiments. Mei Liu, Zhiling Lian, Liming Liu  
16 and Baoshan Kang performed the experiments and analyzed the data. Mei  
17 Liu wrote the manuscript. Qinsheng Gu, Ni Hong and Miguel A. Aranda  
18 revised the manuscript. All authors have read and approved the  
19 manuscript. Qinsheng Gu agrees to serve as the author responsible for  
20 contact and ensures communication.

21 **One sentence summary:** A CGMMV-based vector enables gene function  
22 studies in cucurbits, an extremely low efficiency species for genetic

23 transformation.

24 **Funding information:** This research was supported by the National  
25 Natural Science Foundation of China (31571247), the grants from the  
26 earmarked fund for the China Agriculture Research System  
27 (CARS-26-13), and the Agricultural Science and Technology Innovation  
28 Program (ASTIP), Chinese Academy of Agricultural Sciences  
29 (CAAS-ASTIP-2018-ZFRI-08).

30

31 **Abstract:** Cucurbits produce fruits or vegetables that have great dietary importance  
32 and economic significance worldwide. The published genomes of at least 11 cucurbit  
33 species are boosting gene mining and novel breeding strategies, however genetic  
34 transformation in cucurbits is impractical as a tool for gene function validation due to  
35 low transformation efficiencies. Virus-induced gene silencing (VIGS) is a potential  
36 alternative tool. So far, very few ideal VIGS vectors are available for cucurbits. Here,  
37 we describe a new VIGS vector derived from cucumber green mottle mosaic virus  
38 (CGMMV), a monopartite virus that infects cucurbits naturally. We show that the  
39 CGMMV vector is competent to induce efficient silencing of the phytoene desaturase  
40 (*PDS*) gene in the model plant *Nicotiana benthamiana* and in cucurbits, including  
41 watermelon, melon, cucumber and bottle gourd. Infection with the CGMMV vector  
42 harboring *PDS* sequences of 69-300 bp in length in the form of sense-oriented or  
43 hairpin cDNAs resulted in photobleaching phenotypes in *N. benthamiana* and  
44 cucurbits by *PDS* silencing. Additional results reflect that silencing of the *PDS* gene  
45 could persist for over two months and the silencing effect of CGMMV-based vectors  
46 could be passaged. These results demonstrate that CGMMV vector could serve as a  
47 powerful and easy-to-use tool for characterizing gene function in cucurbits.

48

49 **Keywords:** Cucumber green mottle mosaic virus; viral vector; virus-induced gene

50 silencing; cucurbit plants

## 51 **Introduction**

52 The family *Cucurbitaceae* is second only after the *Solanaceae* for its economic  
53 importance among horticultural species worldwide, containing about 1000 species in  
54 96 genera (Renner and Schaefer, 2016). Cucurbits are generally prized for their  
55 delicious fruits, which might be low in nutritional value, but can be significant dietary  
56 sources of minerals and vitamins, some even with medical values. Watermelon  
57 (*Citrullus lanatus*), melon (*Cucumis melo*), cucumber (*Cucumis sativus*) and bottle  
58 gourd (*Lagenaria siceraria*) all belong to the family *Cucurbitaceae* with a significant  
59 impact on human nutrition (Grumet et al., 2017).

60 With the increase of consumer's demand for high-quality fruits and vegetables  
61 and the improvement of agricultural production, it is urgent to explore genes encoding  
62 important agronomic traits in crop species, in order to breed elite, disease-resistant  
63 and featured varieties. So far, 11 reference genomes of cucurbit species (Zheng et al.,  
64 2019) including watermelon (Guo et al., 2013), melon (Garcia-Mas et al., 2012) and  
65 cucumber (Huang et al., 2009) have been published, which have boosted gene mining  
66 and gene function research. However, the genetic transformation of cucurbit plants is  
67 time-consuming and labor-intensive, with extremely low efficiencies (Choi et al.,  
68 1994). As a tool for rapid gene function validation, virus-induced gene silencing  
69 (VIGS) is a good alternative to gene transformation because of its simplicity, high  
70 efficiency, and high throughput.

71 Gene silencing comprises transcriptional gene silencing (TGS) and  
72 post-transcriptional gene silencing (PTGS). VIGS, a type of PTGS, is a natural  
73 defense reaction that exists in a broad range of organisms. It confers resistance to  
74 foreign nucleic acid invasion through PTGS at the RNA level. Because it can silence a  
75 specific gene, leading to the loss of function of this gene, the potential of VIGS as a  
76 tool to analyze gene function has been quickly recognized (Baulcombe, 1999).

---

77 In the past decades, a large number of viral vectors had been developed as  
78 powerful tools for the functional verification of genes in plants (Ruiz et al., 1998; Liu  
79 et al., 2002; Ding et al., 2006; Igarashi et al., 2009; Zhang et al., 2010; Sempere et al.,  
80 2011; Liu et al., 2016; Wang et al., 2016). To date, three different RNA viruses have  
81 been developed as vectors for VIGS in cucurbit species, including apple latent  
82 spherical virus (ALSV) (Igarashi et al., 2009), tobacco ringspot virus (TRSV) (Zhao  
83 et al., 2016) and tobacco rattle virus (TRV) (Bu et al., 2019; Liao et al., 2019).  
84 However, very few applications of these vectors have been reported, implying that  
85 they have not been widely adopted for cucurbit gene function analyses. This might be  
86 related to their limited host range among cucurbits, cumbersome inoculation  
87 approaches and/or short silencing periods associated with insert instability. As a result,  
88 it is urgent to develop a vector with a wider range of cucurbit hosts, ease of  
89 inoculation, high silencing efficiency and long-lasting gene silencing in cucurbit  
90 plants.

91 Cucumber green mottle mosaic virus (CGMMV) is an important pathogen  
92 infecting cucurbit plants in natural conditions (Dombrovsky et al., 2017). We have  
93 successfully constructed a full-length infectious clone of CGMMV, which can  
94 systemically infect plants of various cucurbit species such as watermelon, melon,  
95 cucumber and bottle gourd (Liu et al., 2017), making it a good candidate for VIGS  
96 vector development in cucurbits. CGMMV is a member of the genus *Tobamovirus*,  
97 and has a positive single-stranded genomic RNA of approximately 6.4 kb (Ugaki et al.,  
98 1991). The CGMMV genome possesses four open reading frames (ORFs) encoding  
99 two replication-related proteins, one movement protein (MP), and one coat protein  
100 (CP). Only the 129 KDa and 186 KDa of replication-related proteins are translated  
101 directly from the genomic RNA, whereas the 29-KDa MP and the 17.4-KDa CP are  
102 translated from two subgenomic RNAs. There is an overlap between the MP and CP  
103 ORFs (Ugaki et al., 1991). Viral vectors based on CGMMV for expressing foreign  
104 genes have been constructed. Multiple cloning sites (MCS) were inserted adjacent to  
105 the CP ORF, and the CP stop codon was altered to express the hepatitis B surface  
106 antigen and a Dengue virus Epitope so that 20 and 44 foreign amino acids,  
107 respectively, were expressed (Ooi et al., 2006; Teoh et al., 2009). Tobacco mosaic  
108 virus (TMV), another member of the genus *Tobamovirus*, has been widely studied as a

109 model in this genus. TMV has successfully been developed as a VIGS vector by  
110 including an additional duplicated copy of the CP subgenomic promoter (SGP) in the  
111 viral genome (Kumagai et al., 1995). The CGMMV genome is similar to that of TMV,  
112 and thus it was thought that methods similar to those used for TMV could be used to  
113 create vectors based on CGMMV; unfortunately, results in this regard varied largely  
114 (Zheng et al., 2015; Jailani et al., 2017), therefore the strategy of SGP duplication and  
115 information on the subgenomic promoter have not been fully exploited for  
116 constructing CGMMV-based viral vectors.

117 CGMMV has not been reported for its development for VIGS, although it has  
118 been exploited as a transient gene expression vector by readthrough translation or  
119 adding an additional subgenomic CP promoter. In this study, we developed a new  
120 CGMMV-based VIGS vector, which produces very mild viral symptoms and  
121 efficiently triggers gene silencing in the model plant *N. benthamiana* and cucurbit  
122 plants such as watermelon, melon, cucumber and bottle gourd.

## 123 **Materials and methods**

### 124 **Plant materials**

125 The CGMMV experimental host *N. benthamiana* and cucurbits hosts  
126 (watermelon, melon, cucumber and bottle gourd) were used for VIGS of the *PDS*  
127 gene by CGMMV vectors in this study. Watermelon (Zhengkang 2), melon (Baimei),  
128 cucumber (Jinyan 4) and bottle gourd (Yongzhen1) seeds were obtained from  
129 Zhengzhou Fruit Research Institute (Zhengzhou, China), Xinjiang Academy of  
130 Agricultural Sciences (Xinjiang, China), Tianjin Academy of Agricultural Sciences  
131 (Tianjin, China) and Ningbo Academy of Agricultural Sciences (Ningbo, China),  
132 respectively. All cucurbit seeds were soaked in sterile water for 3 ~ 4 hours at 50 °C,  
133 then placed in Petri plates containing wetted filter cotton gauze at 28 °C in darkness  
134 until seeds were germinated. Germinated seeds were planted into pots with nutrient  
135 matrix and grown in a growth chamber under 16 h light at 28°C / 8 h dark at  
136 approximately 22°C. The same conditions were used to grow inoculated plants (see  
137 below) with CGMMV vectors.

### 138 **Construction of the CGMMV-based vectors**

139 pV1a23 was constructed by site-directed mutagenic PCR. A DNA fragment of

140 about 7000 bp, consisting of the 5' end of the pXT1-CGMMV, was amplified using  
141 pXT1-CGMMV as a template with primer pairs Del*HindIII*-X/ S159Z-S (Table S1);  
142 Another DNA fragment of about 4000 bp, consisting of the 3' end of the  
143 pXT1-CGMMV, was amplified using pXT1-CGMMV as a template with primer pairs  
144 S159Z-X/Del*HindIII*-S (Table S1). These two fragments were ligated by homologous  
145 recombination. The resulting construct was named as pV1a23.

146 PCR was performed with primers CP-TC-F and CP-TC-R to remove the CP start  
147 codon of the pXT1-CGMMV (Table S1), resulting in the single-nucleotide  
148 substitution ATG to ACG. The resulting construct was named pXT1-CGACG. pV61,  
149 pV92, pV112 and pV190 VIGS vectors were constructed by site-directed mutagenic  
150 PCR as well. DNA fragment 1 containing CGMMV nt 1- (5711~5840) (GenBank  
151 accession: KY753929) was amplified using pXT1-CGMMV as a template with  
152 primer pairs PXT1-F / (27B-34-R, 58B-34-R, 78B-34-R or 78B-99-R), whereas DNA  
153 fragment 2 containing CGMMV nt 5651/5716 – 6423 was amplified using  
154 pXT1-CGACG as a template with primer pairs PXT1-R /(27B-34-F, 58B-34-F,  
155 78B-34-F or 78B-99-F) (Table S1). These two fragments were ligated by homologous  
156 recombination. The resulting vectors pV61, pV92, pV112 and pV190 are  
157 pXT1-CGMMV derivatives that include a duplicated copy of 61-bp, 92-bp, 112-bp  
158 and 190-bp, respectively, putative CGMMV CP SGP and a single restriction site  
159 (*Bam*HI) between the duplicated CP SGP.

#### 160 **Insertion of different *PDS* fragments into the CGMMV-based vector**

161 For a VIGS test with *PDS* as the target gene, 114-, 213-, and 300-bp cucurbit  
162 *PDS* fragments were inserted into digested pV1a23 with *HindIII* in sense orientation  
163 to produce *PDS* silencing constructs pV1a23-PDS11414, pV1a23-PDS21313 and  
164 pV1a23-PDS30000, respectively. Three primer sets CuPDS-*HindIII*-F/R,  
165 CuPDS-*HindIII*-2F/ 2R and CuPDS-*HindIII*-3F/3R were designed to amplify 114-,  
166 213- and 300-bp fragments of the cucurbit *PDS* gene, respectively (Table S1).  
167 Similarly, a series of pV92, pV112 and pV190-based vectors harboring different *PDS*  
168 fragments of varied sizes were constructed. Seven primer sets 58-150-F/R,  
169 78-34-150F/R, 78-150-F/R, 58-213-F/-R, 78-34-213F/R, 78-213-F/R, 78-300-F/R

170 were used for amplifying 150-, 213- and 300-bp fragments of the cucurbit *PDS* gene,  
171 respectively (Table S1). Two primer sets 78-146N-F/R and 78-215N-F/R were used  
172 for amplifying 146- and 215-bp fragments of the *N. benthamiana* *PDS* gene,  
173 respectively (Table S1). The resulting ten pV92, pV112 and pV190-derived constructs  
174 were named pV92-PDS150, pV92-PDS213, pV112-PDS150, pV112-PDS213,  
175 pV190-PDS150, pV190-PDS213, pV190-PDS300, pV190-NbPDS146 and  
176 pV190-NbPDS215.

177 pV190-PDS69, a construct carrying a 69-bp fragment (dsRNA hairpin structure)  
178 of the cucurbit *PDS* gene, was constructed using three primer sets 78-69P-X/78-69P-S,  
179 CG-4R/CG-4F, 3R/TxR~R (Table S1). DNA fragment 1 of 870 bp, DNA fragment 2  
180 of 1438 bp and DNA fragment 3 of 9 kb, were PCR-amplified using pV190 as  
181 template and primers 78-69P-X/CG-4R, CG-4F/78-69P-S and 3R/ TxR~R,  
182 respectively. DNA fragment 1, DNA fragment 2 and DNA fragment 3 were ligated by  
183 homologous recombination.

#### 184 **Agroinfiltration and sap inoculation**

185 All constructs were introduced into *Agrobacterium tumefaciens* strain GV3101  
186 by freeze-thaw transformation, then single clones were picked up and transferred into  
187 200  $\mu$ L LB liquid media containing kanamycin ( $50 \mu\text{g mL}^{-1}$ ) and rifampicin ( $50 \mu\text{g}$   
188  $\text{mL}^{-1}$ ) and cultured overnight in a shaker at  $28^\circ\text{C}$ . The bacterium culture was mixed  
189 with LB at a 1:100 ratio and cultured in a shaker overnight, followed by  
190 centrifugation at  $6000\times g$  for 5 min to collect the bacteria. The bacteria were  
191 resuspended in inducing buffer solution containing  $10 \text{ mmol L}^{-1} \text{ MgCl}_2$ ,  $10 \text{ mmol L}^{-1}$   
192 MES, and  $100 \mu\text{mol L}^{-1}$  Acetosyringone, and the final  $\text{OD}_{600}$  value was adjusted to 0.8  
193  $\sim 1$ . The cells were maintained at room temperature ( $25^\circ\text{C}$ ) for at least 2 h before  
194 agroinoculation. The upper 2~3 leaves of *N. benthamiana* at the 6~8 leaf stage and  
195 cotyledons from 14-day-old cucurbit seedlings were infiltrated with the *A.*  
196 *tumefaciens* suspension using a 1-mL syringe.

197 In order to verify whether the silencing effect of these vectors could be passaged,  
198 the sap from leaves of the agroinfiltrated melon plants displaying obvious  
199 photobleaching was used to rub-inoculate cotyledons and the first true leaf (L1) of the



---

200 melon plants. Each experiment was repeated at least three times, with 9 plants for  
201 each construct in each experiment.

### 202 **DAS-ELISA and RT-PCR**

203 After agroinfiltration and sap inoculation, CGMMV in inoculated plants was  
204 detected by DAS-ELISA and RT-PCR at specific time points. DAS-ELISA was  
205 performed to detect CGMMV accumulation using an ELISA kit (Adgen, Auchincruive,  
206 UK). For RT-PCR, total RNA was extracted from cucurbit (watermelon, melon,  
207 cucumber and bottle gourd) and *N. benthamiana* leaf tissues using the RNA simple kit  
208 (Tiangen Biotech, Beijing, China) and then first-strand cDNA was synthesized from 1  
209  $\mu$ g total RNA using an oligo dT primer according to the protocol of PrimescriptII RT  
210 (TAKARA). PCR was performed with primer set 5574F and 3UTR that flanked the  
211 foreign insert to detect CGMMV and assess the stability of the pV190 and foreign  
212 inserts of CGMMV-based vectors (Table S1).

### 213 **qRT-PCR analysis**

214 qRT-PCR was performed to measure the mRNA expression level of the  
215 endogenous *PDS* genes using the SYBR Green I Master (Roche) in either *N.*  
216 *benthamiana* or cucurbit plants inoculated with CGMMV-based vectors at specific  
217 time points. The first-strand cDNA was synthesized from 1  $\mu$ g total RNA using an  
218 oligo dT primer according to the protocol of PrimeScript<sup>TM</sup>RT reagent Kit with gDNA  
219 Eraser (TAKARA). The expression level of *PDS* of cucumber, melon, gourd and  
220 watermelon was determined using primer sets CuPDS-679F/CuPDS-906R and  
221 wate-q-F/R, respectively, designed to prime outside the region targeted for silencing  
222 (Table S1). Expression of the actin gene by primer set cumactin-F/R (Table S1) was  
223 used as an internal control of cucumber, melon, gourd plants. The *CICAC* gene was  
224 used as an internal control of watermelon plants using primer pairs Cla016178-F/R  
225 (Kong et al., 2015). The primer set NbPDS-qF/R was designed for detecting the  
226 expression of *PDS* in *N. benthamiana*, and the expression of the GAPDH gene  
227 analyzed by the primer set GAPDH-qRT-F/R was referred as an internal control  
228 (Table S1). The expression *PDS* was calculated using the  $2^{-\Delta\Delta CT}$  method (Livak and  
229 Schmittgen, 2001). The expression level of *PDS* in the negative control (pV190) was



230 set to an arbitrary value (1.0) to calculate the relative expression levels of the other  
231 samples, with 3 replicates used for each sample.

## 232 **Results**

### 233 **Construction of a set of CGMMV vectors**

234 The selection of the insertion site of the foreign gene fragment is the first step in  
235 constructing a VIGS vector. Viable options for CGMMV included placing the  
236 insertion site behind the viral MP gene or between the CP gene stop codon and the 3'  
237 non-coding region. For the set of vectors built and tested in this study, we chose to use  
238 the latter as a first strategy. Two *HindIII* restriction sites were found in  
239 pXT1-CGMMV, one located at the 5' end and the other at the 3' end of the CP. We  
240 used the latter as the insertion site for constructing our first VIGS vector, pV1a23,  
241 which is a pXT1-CGMMV derivative missing the first restriction *HindIII* site and  
242 with the 159<sup>th</sup> amino acid of the CP mutated to a stop codon (Fig. 1A). Cucurbit plants  
243 inoculated with this vector showed viral symptoms on upper leaves similar to those of  
244 plants inoculated with the pXT1-CGMMV, and CGMMV could be detected by  
245 DAS-ELISA and RT-PCR in these leaves (Fig. 1B, C; Table S2).

246 CGMMV, similarly to TMV, belongs to the genus *Tobamovirus*, and TMV has  
247 been successfully used in VIGS. Thus, we used a second strategy, similar to that used  
248 for TMV by including a duplicated copy of the CP SGP in the viral genome (Kumagai  
249 et al., 1995) to build vectors pV61, pV92 and pV112; these vectors are  
250 pXT1-CGMMV derivatives with different lengths of the CP promoter (61, 92 and 112  
251 nucleotides) and a single restriction site (*BamHI*) between the duplicated CP promoter  
252 (Fig. 2A). Viral symptoms could be observed on upper leaves of plants inoculated  
253 with vectors pV92 and pV112, whereas plants inoculated with pV61 did not develop  
254 viral symptoms and CGMMV could not be detected by DAS-ELISA (Table S2).  
255 These results revealed that vectors pV92 and pV112 have the ability to infect plants  
256 systemically while pV61 has not.

257 Our previous work revealed that the CP RNA transcription level was  
258 significantly enhanced when 105 nucleotides were retained before the CP

---

259 transcription starting site (TSS) and that the sequence from the 71<sup>st</sup> base to the 91<sup>st</sup>  
260 base upstream of the CP TSS plays a key role in CP SGP activity (Liu et al., 2019).  
261 Based on these results, we built pV190, which is a pXT1-CGMMV derivative that  
262 contains a direct repeat of the 190-bp putative CGMMV CP SGP and a single  
263 restriction site (*Bam*HI) between the duplicated CP SGPs (Fig. 2A). *N. benthamiana*  
264 and cucurbit plants inoculated with pV190 developed very mild symptoms on upper  
265 leaves, which were clearly milder than those of plants inoculated with the  
266 pXT1-CGMMV (Fig. 2B). However, the recombinant pV190 genomic RNA could be  
267 detected by RT-PCR (Fig. 2C), indicating that it could replicate and move  
268 systemically.

### 269 **Silencing effects of *PDS* fragments inserted in the sense orientation or** 270 **conforming a hairpin**

271 To determine whether pV1a23, pV92, pV112 and pV190 can be used to induce  
272 gene silencing in cucurbits, we chose to target *PDS* because it can result in striking  
273 photo-bleaching when silenced (Holzberg et al., 2002). Based on an alignment of *PDS*  
274 gene coding sequences of watermelon, cucumber, melon and bottle gourd, we  
275 designed four primer sets selecting the region with the highest conservation to amplify  
276 114-, 150-, 213- and 300-bp fragments of the cucurbit *PDS* genes. The sequences  
277 similarity of the 114-, 150- and 213-bp fragments in the four cucurbit species was  
278 approximately 97% (Fig. S1A~C). The sequence similarity of the 300-bp fragments  
279 was 98.4%, but the fragment from watermelon contains an insertion of 30 bp  
280 (Fig.S1D). The *PDS* fragments of 114-bp, 213-bp and 300-bp were inserted in the  
281 sense orientation at the *Hind*III cloning site of pV1a23 to produce pV1a23-PDS114,  
282 pV1a23-PDS213 and pV1a23-PDS300, respectively. To verify the silencing efficiency  
283 of these vectors, cucurbit plants were subjected to *Agrobacterium*-mediated  
284 inoculation. Uninoculated leaves of inoculated plants with pV1a23-PDS213 or  
285 pV1a23-PDS300 did not show any symptoms at 14 days post inoculation (dpi) and 21  
286 dpi. Viral symptoms could be clearly observed in systemically infected leaves of all  
287 infected plants with pV1a23-PDS114; however, the *PDS*-silencing photobleaching  
288 phenotype could not be observed (Fig. 1B). DAS-ELISA showed the presence of

---

289 CGMMV in uninoculated leaves of inoculated plants with pV1a23-PDS114 and in  
290 leaves inoculated with pV1a23-PDS213, however, the presence of CGMMV could not  
291 be detected in leaves of plants inoculated with pV1a23-PDS300 (Table S2). We  
292 reasoned that the absence of the photobleaching could be due to the deletion of the  
293 114-bp *PDS* gene fragment. However, RT-PCR showed that the 114-bp *PDS* gene  
294 fragment was stable (Fig. 1C). These results revealed that pV1a23-PDS300 lost the  
295 ability of systemic and local infection, pV1a23-PDS213 was only able to infect  
296 locally and pV1a23-PDS114 could produce systemic and local infection, but failed  
297 inducing photobleaching.

298 The *PDS* fragments of 150 bp and 213 bp were inserted in the sense orientation  
299 at the *Bam*HI cloning site of pV92 and pV112 to produce pV92-PDS150,  
300 pV92-PDS213 and pV112-PDS150 and pV112-PDS213, respectively. Watermelon,  
301 cucumber and melon plants were inoculated with these vectors for testing their ability  
302 to induce *PDS* silencing. Photobleaching could be observed in the inoculated plants  
303 with pV92-PDS150 and pV112-PDS150 (Table S3). However, pV92-PDS213- and  
304 pV112-PDS213-infected plants did not display any photobleached phenotype and the  
305 presence of CGMMV in the upper leaves was not observed (Table S3).

306 The *PDS* fragments of 150 bp, 213 bp and 300 bp were also inserted in the sense  
307 orientation at the *Bam*HI cloning site of pV190 to produce pV190-PDS150,  
308 pV190-PDS213 and pV190-PDS300, respectively. The cotyledons of watermelon,  
309 melon, cucumber and bottle gourd seedlings were inoculated with the above vectors.  
310 Photo-bleaching was first observed on the 4<sup>th</sup> true leaves (L4) in watermelon at about  
311 19 dpi, on the 3<sup>rd</sup> leaves (L3) in melon and bottle gourd at 12 dpi (Fig. 3A), and on the  
312 5<sup>th</sup> true leaves of cucumber at 28 dpi (data not shown). Further, photobleaching was  
313 observed up to 32, 20 and 39 dpi in watermelon, melon and cucumber plants,  
314 respectively (Fig. 3B). About 70% of the inoculated plants showed a photobleaching  
315 phenotype. Total RNA was extracted from leaves of the plants inoculated with  
316 different vectors displaying the most obvious photobleaching (Fig. 4A) and the  
317 accumulation of *PDS* transcripts was quantified by qRT-PCR. The results showed that  
318 the expression levels of *PDS* had no significant differences between pV190-infected

319 (EV) and noninfected (NI) leaves, demonstrating that pV190 did not significantly  
320 affect *PDS* expression (Fig. 4B). The *PDS* mRNA transcript levels in photobleached  
321 leaves was reduced by approximately 79%, 81% and 89% in watermelon, 78%, 76%  
322 and 81% in melon, 83%, 87% and 89% in bottle gourd, and 82%, 64% and 88% in  
323 cucumber infected with pV190-PDS150, pV190-PDS213 and pV190-PDS300,  
324 respectively, compared to plants infected with pV190 (Fig. 4B).

325 To improve silencing efficiency, we inserted a *PDS* fragment forming a hairpin  
326 structure of 69-bp into pV190 to produce the pV190-PDS69 vector. We first observed  
327 photobleaching on the L5 in watermelon at 17 dpi, on the L2 in melon at 10 dpi and  
328 on the L3 in bottle gourd at 11 dpi (Fig. 3). Photobleaching was first observed one or  
329 two days earlier in plants infected with pV190-PDS69 than in plants infected with any  
330 other vector. The *PDS* mRNA levels declined 76%, 41%, 42% and 83% in  
331 watermelon, melon, cucumber and bottle gourd, respectively (Fig. 4B).

### 332 **Stability of the 69-300-bp *PDS* fragments in pV190**

333 We observed that the silencing phenotype of the *PDS* gene could persist for over  
334 2 months in bottle gourd (Fig. 5A). Photobleaching was not uniform from bottom to  
335 top of bottle gourd leaves (Fig. 5B). To evaluate the stability of the *PDS* fragment in  
336 CGMMV-vectors, RT-PCR was performed on total RNA extracted from bottle gourd  
337 leaves L6, L7 and L9 for pV190-PDS69, L4 and L11 for pV190-PDS300, L4 and L12  
338 for pV190-PDS213, and L7, L9 and L10 for pV190-PDS300 (Fig. 5B). The result  
339 showed the 150-bp and 213-bp *PDS* fragments were stable across all analyzed leaves.  
340 The 69-bp dsRNA hairpin structure could not be detected across all leaves, whereas  
341 L9 and L10 samples from pV190-PDS300-infected bottle gourd contained deletions  
342 of the 300-bp *PDS* fragment to different extents (the deletion in L9 was less than the  
343 L10) (Fig. 5C). The relative expression of the *PDS* gene in the above same leaves was  
344 measured by qRT-PCR. RT-PCR results corresponded well with the *PDS* relative  
345 expression level measured by qRT-PCR, with less silencing observed as the extent of  
346 deletions increased (Fig. 5C, D). For instance, pV190-PDS69 caused *PDS* transcripts  
347 to be reduced by 83%, 80% and 65% in the L6, L7, L9, respectively, and  
348 pV190-PDS300 caused *PDS* transcripts to be reduced by 87%, 81% 73% and 65% in

349 the L7, L8, L9 and L10, respectively (Fig. 5D). Results of stability of the 69-300-bp  
350 *PDS* fragments in pV190 in watermelon, melon and cucumber were consistent with  
351 those in bottle gourd (data not shown). The expression of *PDS* in the youngest  
352 analyzed leaves was still down-regulated (Fig. 5D), indicating that these vectors have  
353 sufficient stability to be used to characterize gene functions in cucurbit plants.

#### 354 **The silencing effect of CGMMV-based vectors could be passaged**

355 To verify whether the silencing vectors can be passaged, the sap of leaves with  
356 obvious photobleaching was used to rub-inoculate cotyledons and the L1 of melon  
357 plants. Photobleaching occurred on uninoculated leaves as early as 9 dpi and was  
358 photographed at 14 dpi (Fig. 6A). *PDS* expression levels were tested on L5 of  
359 passaged plants. We observed that *PDS* relative expression was reduced by 32%, 52%,  
360 25% and 85% in pV190-*PDS*69, -*PDS*150, -*PDS*213 and -*PDS*300, respectively (Fig.  
361 6B), confirming that the silencing effect of CGMMV-based vectors could be  
362 passaged.

#### 363 **CGMMV-based VIGS in *N. benthamiana***

364 *N. benthamiana* is an important experimental host for CGMMV. We utilized two  
365 different lengths of *PDS* fragments which were amplified by selecting conserved  
366 regions of *PDS* gene sequences in *N. benthamiana* to test whether CGMMV is  
367 competent to induce gene silencing in *N. benthamiana* plants. At 14 dpi, a little weak  
368 photobleaching could be observed in the upper leaves of all plants inoculated with  
369 either pV190-Nb*PDS*146 or pV190-Nb*PDS*215 (Fig. S2A). Consistently, qRT-PCR  
370 results showed that the expression of *PDS* in pV190-Nb*PDS*146- and  
371 pV190-Nb*PDS*215-infected leaves was reduced by 60% and 34%, respectively,  
372 compared with the pV190 infected leaves (Fig. S2B).

373

#### 374 **Discussion**

375 In this study, we evaluated whether CGMMV could be used for constructing a  
376 viral vector to silence endogenous genes in cucurbit plants. A new CGMMV-based  
377 VIGS vector was developed through multiple attempts. Using this viral system, we  
378 successfully silenced *PDS* in cucurbits including watermelon, melon, cucumber and

---

379 bottle gourd and in the model plant *N. benthamiana*. To our knowledge, this is the  
380 first time that CGMMV has been engineered as a VIGS vector, although it has been  
381 exploited for protein overexpression (Ooi et al., 2006; Teoh et al., 2009; Zheng et al.,  
382 2015; Jailani et al., 2017; Tran et al., 2019).

383 CGMMV has several characteristics that makes it a good candidate for VIGS  
384 vector in cucurbits. First, CGMMV can infect numerous species of cucurbits in  
385 natural conditions (Dombrovsky et al., 2017) and full-length infectious clones have  
386 been constructed successfully, which can systemically infect *N. benthamiana* and  
387 various cucurbit species including watermelon, melon, cucumber and bottle gourd and  
388 possesses high infection efficiency (*e.g.*, Liu et al., 2017). Second, CGMMV has a  
389 relatively small, positive single-strand RNA genome of 6,423 nt, which makes it easy  
390 to handle during either the process of preparing a VIGS construct or for inoculations.

391 During the process of modifying the CGMMV genome to produce a VIGS  
392 vector, we observed that the insertion sites of the gene fragment determined the  
393 viability, stability, insert size and silencing efficiency of the vector; our work showed  
394 that a duplicated copy of the 190-bp putative CGMMV CP SGP was essential for  
395 silencing. We first tried to place the foreign gene insertion site downstream of the  
396 viral CP gene. Results demonstrated that the insertion site between the CGMMV CP  
397 gene stop codon and the 3' non-coding region was not suitable for constructing the  
398 VIGS vector. TMV is a member of the genus *Tobamovirus* and has successfully been  
399 developed as a VIGS vector by utilizing the strategy of subgenomic expression  
400 (Kumagai et al., 1995). Because CGMMV is also a member of the genus *Tobamovirus*  
401 and CGMMV infectious clone containing the green fluorescence protein (GFP)  
402 reporter gene has been successfully constructed, the GFP gene was located in between  
403 MP and CP (Zheng et al., 2015). Thus, we adopted a similar strategy to generate a  
404 CGMMV VIGS vector and explored different lengths of the duplicated region. When  
405 the modified CGMMV-based vector contained a duplicated copy of the 61-bp putative  
406 CGMMV CP SGP, the vector (pV61) lost its ability of systemic infection. When the  
407 modified CGMMV-based vector contained a duplicated copy of 92-bp or 112-bp  
408 putative CGMMV CP SGP, *PDS* silencing was not sufficiently robust (Table S3). In



---

409 contrast, when the modified CGMMV-based vector contained a 190-bp duplicated  
410 copy of the putative CGMMV CP SGP, the *PDS* gene fragments could induce a robust  
411 silencing phenotype. These results suggest that it is necessary to create an additional  
412 fully competent subgenomic promoter to drive the transcription of the VIGS target  
413 sequence and for providing the vector with the ability to systemically infect plants  
414 (Mei et al., 2016).

415 Vectors containing duplicated sequences frequently suffer partial or complete  
416 loss of inserted sequences, particularly when the insert size is large (Avesani et al.,  
417 2007; Dickmeis et al., 2014). We tested the effect of the length and structure of inserts  
418 on silencing. Our results showed that the CGMMV vectors harboring the  
419 sense-oriented *PDS* gene sequence of 100-300 bp in length could effectively induce  
420 silencing in cucurbits, and efficiency was highest for largest fragment, the 300-bp  
421 *PDS* gene fragment. It is worth mentioning the effect on silencing of the cDNA insert  
422 length in a tobacco rattle virus (TRV)-based vector (Liu and Page, 2008). The better  
423 silencing phenotype could be produced when the cDNA insert length was between  
424 200 bp and 1300 bp, whereas inserts shorter than 190 bp and longer than 1661 bp  
425 generated less siRNAs silencing less efficiently (Liu and Page, 2008). Not only the  
426 length of the insert affected silencing but also the structure of it has an impact on  
427 silencing. Expression of a hairpin-loop dsRNA structure could enhance the efficiency  
428 of VIGS (Lacomme et al., 2003). This seems to be true for our CGMMV-based VIGS  
429 vector. The silencing efficiency of a 69-bp hairpin-loop structure was between that of  
430 the 150-bp and 300-bp sense constructs, but its silencing phenotype appeared earlier. A  
431 direct 60-bp inverted-repeat sequence of the target gene that could fold as dsRNA  
432 strongly enhanced VIGS from foxtail mosaic virus (FoMV) (Liu et al., 2016).  
433 However, in our work, a 60-bp inverted-repeat sequences of the *PDS* gene could not  
434 produce photobleaching, and CGMMV lost the ability of systemic infection  
435 (unpublished data). Therefore, these results suggest that the effect of length and  
436 structure of inserts on silencing varied with vectors from different viruses.

437 Furthermore, the stability of inserts in the pV190 vector were evaluated. The  
438 photobleaching phenotype was observed from the 3<sup>rd</sup> to the 11<sup>th</sup> leaves and *PDS*



---

439 transcripts were reduced by about 80% and 20% in L4/L5 and L10/L11. About 70%  
440 of tested plants had a photobleaching phenotype which was stable and persisted for  
441 over two months. Stable photobleaching was also observed in plants mechanically  
442 inoculated with leaf sap prepared from L5/L6 of CGMMV-PDS inoculated plants.  
443 Here, it is worth mentioning that *PDS* transcript abundance could be reduced by  
444 CGMMV-PDS vectors on the 3<sup>rd</sup> to 10<sup>th</sup> leaves of the tested plants. However, the  
445 photobleaching phenotype and the *PDS* transcript levels were not uniform in these  
446 leaves, and could produce a gradient from bottom to top. It has been reported that the  
447 phenomenon could be due to instability of the *PDS* gene fragment. RT-PCR analyses  
448 on all of these leaves showed that deletion of the *PDS* insert was hardly detected in  
449 samples with the sense inserts. Hence, we reasoned that gene-silencing efficiency may  
450 be related to the accumulation of the foreign fragment-derived siRNAs (Molnar et al.,  
451 2010; Alvarado and Scholthof, 2012), but the specific mechanism of action is still  
452 unclear. In contrast, the full-length sequence of the insert in the pV190-PDS69 vector  
453 could not be detected in photobleached leaves. This phenomenon may be explained  
454 by a systemic silencing signal that can be actively transmitted over long distances  
455 through the phloem to induce *PDS* gene silencing in young leaves (Palauqui et al.,  
456 1997; Dunoyer et al., 2005; Molnar et al., 2010), but the exact molecular form of a  
457 mobile RNA signal in the phloem still needs further research.

458 In addition, we tested whether pV190 can be used to induce gene silencing in *N.*  
459 *benthamiana*. Results showed that pV190 could infect *N. benthamiana* leaves, the  
460 uninoculated systemic leaves developed very mild symptoms. The pV190 vectors,  
461 harboring 146-bp and 215-bp *PDS* fragments could trigger silencing, but the  
462 photobleaching phenotype was not striking. The photobleaching phenotype also  
463 varied in cucurbit plants, with the most obvious phenotype in bottle gourd. We  
464 reasoned that the viral vector has different fitness for different hosts. The  
465 accumulation of siRNAs is a crucial factor for silencing efficiency, while the host  
466 species also contain crucial factors including the *DCL*, *RDR* and *AGO* genes (Bouché  
467 et al., 2006) (Donaire et al., 2008; Zhang et al., 2012).

468 Apple latent spherical virus was first described as a vector for gene silencing in

---

469 cucurbits (Igarashi et al., 2009), and few additional studies have reported its  
470 application for VIGS in cucurbit plants. A new TRSV vector was recently reported  
471 (Zhao et al., 2016). More recently, the TRV-VIGS system has been used in cucumber  
472 and oriental melon (Bu et al., 2019; Liao et al., 2019). Comparing ALSV, TRSV and  
473 TRV with CGMMV, the first three belong to multipartite virus families with a  
474 bipartite genome, while CGMMV is a monopartite virus (Ugaki et al., 1991), and  
475 therefore is easier to manipulate. The ALSV genome is expressed through polyprotein  
476 synthesis followed by proteolytic processing, which represents another layer of  
477 difficulty for high throughput functional genomics (Lu et al., 2003; Burch - Smith et  
478 al., 2004). A second major difference among the four cucurbit viral vectors is the  
479 inoculation method. *A. tumefaciens* infiltration is a simple, effective and convenient  
480 inoculation way (Ryu et al., 2004; Fu et al., 2005) and TRSV, TRV and CGMMV  
481 vectors are designed for agroinfiltration (Senthil-Kumar and Mysore, 2011; Zhao et  
482 al., 2016). Moreover, a new infection method with a special agroinfiltration solution  
483 used with the TRV VIGS system suitable for cucumber, provided rapidity,  
484 convenience and highly efficient gene silencing (Bu et al., 2019). Host range is  
485 another major difference. TRSV cDNA clones are not infectious in watermelon or  
486 pumpkin (Zhao et al., 2016). Although TRV has been widely used as VIGS vector  
487 since it has a wide host range (Ratcliff et al., 2001), its application for VIGS on  
488 cucurbits except cucumber and oriental melon have not been reported (Bu et al., 2019;  
489 Liao et al., 2019). Both ALSV and CGMMV vectors can be successfully used on  
490 common cucurbit plants such as watermelon, melon, cucumber and bottle gourd  
491 (Igarashi et al., 2009). At last, the CGMMV-based VIGS vector pV190 can produce  
492 very mild viral symptoms in upper leaves of inoculated plants and is highly infectious.  
493 Silencing phenotypes caused by pV190-based VIGS vectors were stable and could  
494 persist for at least one month.

495 CGMMV has a broad host range including 29 species, of which at least 16  
496 belong to Cucurbitaceae (Dombrovsky et al., 2017). Thus, the pV190 VIGS vector  
497 should have the potential for VIGS in many other plants although we only evaluated  
498 its application in *N. benthamiana*, watermelon, melon, cucumber and bottle gourd.

---

499 Taken together, the CGMMV-based silencing system could be applied as a powerful  
500 biotechnological tool with a great potential for studying functional genomics in  
501 cucurbits. Future study will focus on obtaining insights into the molecular mechanism  
502 underlying the difference in silencing efficiency between different plants. In addition,  
503 the vector could serve as a basis to control devastating viral pathogens or carry out  
504 genetic engineering and molecular breeding.

505

### 506 **Accession Numbers**

507 Sequence data from this article can be found in the GenBank or Cucurbit  
508 Genomics Database (<http://cucurbitgenomics.org/>) under the following accession  
509 numbers: CGMMV (KC851866); *Nicotiana benthamiana* PDS ( EU165355 );  
510 *Cucumis sativus* PDS (XM\_011654729); *Cucumis melo* PDS (NM\_001297530 );  
511 *Citrullus lanatu* PDS (Cla010898; C1CG07G015130); *Lagenaria siceraria* PDS  
512 (Lsi07G003470).

### 513 **Supplemental Data**

514 **Supplemental Figure S1:** The sequence similarities of 114-, 150- , 213- and 300-bp  
515 PDS gene fragments in four cucurbit species. A, B, C and D correspond to PDS  
516 fragments of 114-, 150- , 213- and 300-bp, respectively, in the four cucurbit species.  
517 HG, HUG, XG and TG represented cucumber, bottle gourd, watermelon and melon,  
518 respectively.

519 **Supplemental Figure S2:** Silencing efficiency of different length inserts (PDS) using  
520 the pV190 VIGS vector in *N. benthamiana*. Fragments of 146 bp, 215 bp were  
521 separately cloned into pV190 VIGS vector. A, The silencing phenotypes were  
522 observed at 14dpi. B, The relative expression level of PDS mRNA determined by  
523 real-time qRT-PCR.

524 **Supplemental Table S1:** Primers used in this study.

525 **Supplemental Table S2:** The infection analysis of pV1a23 (insertion sites behind the  
526 viral CP gene) vector in watermelon.

527 **Supplemental Table S3:** The infection analysis of modified CGMMV-based vector  
528 contains a duplicated copy of the 61-, 92-, 112- and 190-bp putative CGMMV CP  
529 SGP.

530

531 **Figure legends:**

532

533 **Figure 1:** Engineering of CGMMV as a VIGS vector with an insertion site behind the  
534 CP. A, Schematic representation of the pV1a23 vector with a restriction enzyme site  
535 (*HindIII*) for insertion of gene fragments. B, Viral symptoms on upper non-inoculated  
536 leaves caused by pV1a23 similar to those of plants inoculated with the  
537 pXT1-CGMMV. Photobleaching was absent on plants inoculated with  
538 pV1a23-PDS114. C, RT-PCR detection of viral RNA from pV1a23 and  
539 pV1a23-PDS114 in watermelon. M: Marker2000; CK: negative control; 1, 2 and 3  
540 indicate healthy control and plants inoculated with pV1a23 and pV1a23-PDS114,  
541 respectively.

542 **Figure 2:** Engineering of CGMMV as a VIGS vector with different size CP  
543 subgenomic promoters. A, Schematic representation of pV61, pV92, pV112 and  
544 pV190. pV- is a pXT1-CGMMV derivative that contains a direct repeat of the 61-, 92-,  
545 112- and 190-bp putative CGMMV CP subgenomic promoter and a restriction  
546 enzyme site (*BamHI*) between CP subgenomic promoters. B, pV190 caused mild  
547 systemic symptoms on cucurbits and *N. benthamiana*. C, RT-PCR detection of viral  
548 RNA showing that pXT1-CGMMV and pV190 are infectious in cucurbits and *N.*  
549 *benthamiana*. M: Marker2000; WT: wild type (pXT1-CGMMV); CK: negative  
550 control; W, M, C, G and Nb indicate watermelon, melon, cucumber, bottle gourd and  
551 *N.benthamiana*, respectively.

552 **Figure 3:** *PDS* silencing using the VIGS vectors pV190-PDS69, pV190-PDS150,  
553 pV190-PDS213 and pV190-PDS300. A, Photobleaching was first observed and  
554 photographed in watermelon at 19dpi, and in melon and bottle gourd plants at 12dpi.  
555 B, Photobleaching was photographed in watermelon at about 32 dpi, in melon at  
556 about 20 dpi and in cucumber at about 39 dpi, respectively.

557 **Figure 4:** Silencing efficiency of VIGS vectors carrying *PDS* fragments of different

558 sizes on cucurbits. A, indicate the uninoculated leaves displaying most obvious  
559 photobleaching on watermelon plants at 32 dpi, on melon at 27 dpi, on cucumber at  
560 39 dpi and on bottle gourd at 34 dpi, respectively. B, Real-time qRT-PCR analysis of  
561 *PDS* expression in noninfected (NI), pV190 empty vector (EV), and  
562 CGMMV-*PDS*-infected cucurbit (watermelon, melon, cucumber and bottle gourd)  
563 plants. Three technical replicates were performed for each individual sample (\*,  $P <$   
564  $0.05$  and \*\* $P < 0.01$  \*\*\* $P < 0.001$  compared with the empty vector (pV190) by  
565 Student's t test. Error bars indicate the SD.

566 **Figure 5:** Silencing efficiency and stability of the pV190 VIGS vector with different  
567 length inserts in bottle gourd. Fragments of 69 bp (dsRNA hairpin structure), 150 bp,  
568 213 bp, 300 bp were separately cloned into pV190. A, Silencing *PDS* using pV190 on  
569 bottle gourd plants produced photobleaching that persisted for over 70 days. B,  
570 Photobleaching on newly emerging leaves of bottle gourd plants caused by *PDS*  
571 silencing was observed at 29, 34, 41, 48 and 54 dpi, respectively. C, RT-PCR assay to  
572 detect the presence of pV190 carrying *PDS* fragments of different sizes in systemic  
573 leaves. Samples from the 4<sup>rd</sup> leaf above the inoculated (L4) were collected at 29 dpi;  
574 L6, L7 and L8 samples were collected at 34 dpi, L9 sample was collected at 41 dpi,  
575 L10 at 48 dpi, L11 and L12 at 54 dpi. M: Marker2000; EV: Empty vector (pV190). D,  
576 Relative expression level of *PDS* mRNA in the above indicated leaves determined by  
577 real-time qRT-PCR.

578 **Figure 6:** The silencing effect of pV190-*PDS*69, -*PDS*150, -*PDS*213 and -*PDS*300  
579 could be passaged. A, Photobleaching caused by *PDS* silencing in systemic leaves of  
580 melon plants that were rub inoculated with sap from pV190-*PDS*69, -*PDS*150,  
581 -*PDS*213 and -*PDS*300-infected leaf tissue. The photobleaching phenotype was  
582 observed and photographed at 9dpi / 14dpi. B, Real-time qRT-PCR analysis of *PDS*  
583 expression in the 5<sup>th</sup> leaf above the inoculated (L5) of noninfected (NI), pV190 empty  
584 vector (EV), and pV190-*PDS*69, -*PDS*150, -*PDS*213 and -*PDS*300-infected melon by  
585 mechanical inoculation.

586

587 **ACKNOWLEDGMENTS**

588 We thank Yule Liu (Tsinghua University, Beijing) for thoughtful advice on  
589 designing VIGS vectors. We also thank Tao Zhou (China Agricultural University,  
590 Beijing) and Zhangjun Fei (Boyce Thompson Institute, USA) revised this manuscript.

591

## 592 Literature Cited

- 593 **Alvarado VY, Scholthof HB** (2012) AGO2: a new Argonaute compromising plant virus accumulation.  
594 *Frontiers in plant science* **2**: 112
- 595 **Avesani L, Marconi G, Morandini F, Albertini E, Bruschetta M, Bortesi L, Pezzotti M, Porceddu**  
596 **A** (2007) Stability of Potato virus X expression vectors is related to insert size: implications  
597 for replication models and risk assessment. *Transgenic research* **16**: 587-597
- 598 **Baulcombe DC** (1999) Fast forward genetics based on virus-induced gene silencing. *Current opinion*  
599 *in plant biology* **2**: 109-113
- 600 **Bouché N, Laressergues D, Gascioli V, Vaucheret H** (2006) An antagonistic function for  
601 Arabidopsis DCL2 in development and a new function for DCL4 in generating viral siRNAs.  
602 *The EMBO journal* **25**: 3347-3356
- 603 **Bu R, Wang R, Wei Q, Hu H, Sun H, Song P, Yu Y, Liu Q, Zheng Z, Li T** (2019) Silencing of  
604 glycerol-3-phosphate acyltransferase 6 (GPAT6) gene using a newly established virus induced  
605 gene silencing (VIGS) system in cucumber alleviates autotoxicity mimicked by cinnamic acid  
606 (CA). *Plant and Soil* **438**: 329-346
- 607 **Burch - Smith TM, Anderson JC, Martin GB, Dinesh - Kumar SP** (2004) Applications and  
608 advantages of virus - induced gene silencing for gene function studies in plants. *The Plant*  
609 *Journal* **39**: 734-746
- 610 **Choi PS, Soh WY, Kim YS, Yoo OJ, Liu JR** (1994) Genetic transformation and plant regeneration of  
611 watermelon using *Agrobacterium tumefaciens*. *Plant cell reports* **13**: 344-348
- 612 **Dickmeis C, Fischer R, Commandeur U** (2014) Potato virus X - based expression vectors are  
613 stabilized for long - term production of proteins and larger inserts. *Biotechnology journal* **9**:  
614 1369-1379
- 615 **Ding XS, Schneider WL, Chaluvadi SR, Mian MR, Nelson RS** (2006) Characterization of a Brome  
616 mosaic virus strain and its use as a vector for gene silencing in monocotyledonous hosts.  
617 *Molecular Plant-Microbe Interactions* **19**: 1229-1239
- 618 **Dombrovsky A, Tran-Nguyen LT, Jones RA** (2017) Cucumber green mottle mosaic virus: rapidly  
619 increasing global distribution, etiology, epidemiology, and management. *Annual review of*  
620 *phytopathology* **55**: 231-256
- 621 **Donaire L, Barajas D, Martínez-García B, Martínez-Priego L, Pagán I, Llave C** (2008) Structural  
622 and genetic requirements for the biogenesis of tobacco rattle virus-derived small interfering  
623 RNAs. *Journal of virology* **82**: 5167-5177
- 624 **Dunoyer P, Himber C, Voinnet O** (2005) DICER-LIKE 4 is required for RNA interference and  
625 produces the 21-nucleotide small interfering RNA component of the plant cell-to-cell  
626 silencing signal. *Nature genetics* **37**: 1356
- 627 **Fu DQ, Zhu BZ, Zhu HL, Jiang WB, Luo YB** (2005) Virus - induced gene silencing in tomato fruit.  
628 *The Plant Journal* **43**: 299-308



- 
- 629 **Garcia-Mas J, Benjak A, Sanseverino W, Bourgeois M, Mir G, González VM, Hénaff E, Câmara**  
630 **F, Cozzuto L, Lowy E** (2012) The genome of melon (*Cucumis melo* L.). Proceedings of the  
631 National Academy of Sciences **109**: 11872-11877
- 632 **Grumet R, Garcia-Mas J, Katzir N** (2017) Cucurbit genetics and genomics: a look to the future. *In*  
633 Genetics and Genomics of Cucurbitaceae. Springer, pp 409-415
- 634 **Guo S, Zhang J, Sun H, Salse J, Lucas WJ, Zhang H, Zheng Y, Mao L, Ren Y, Wang Z** (2013) The  
635 draft genome of watermelon (*Citrullus lanatus*) and resequencing of 20 diverse accessions.  
636 Nature genetics **45**: 51
- 637 **Holzberg S, Brosio P, Gross C, Pogue GP** (2002) Barley stripe mosaic virus - induced gene silencing  
638 in a monocot plant. The Plant Journal **30**: 315-327
- 639 **Huang S, Li R, Zhang Z, Li L, Gu X, Fan W, Lucas WJ, Wang X, Xie B, Ni P** (2009) The genome  
640 of the cucumber, *Cucumis sativus* L. Nature genetics **41**: 1275
- 641 **Igarashi A, Yamagata K, Sugai T, Takahashi Y, Sugawara E, Tamura A, Yaegashi H, Yamagishi**  
642 **N, Takahashi T, Isogai M** (2009) Apple latent spherical virus vectors for reliable and  
643 effective virus-induced gene silencing among a broad range of plants including tobacco,  
644 tomato, *Arabidopsis thaliana*, cucurbits, and legumes. Virology **386**: 407-416
- 645 **Jailani AAK, Solanki V, Roy A, Sivasudha T, Mandal B** (2017) A CGMMV genome-replicon vector  
646 with partial sequences of coat protein gene efficiently expresses GFP in *Nicotiana*  
647 *benthamiana*. Virus research **233**: 77-85
- 648 **Kong Q, Yuan J, Gao L, Zhao L, Cheng F, Huang Y, Bie Z** (2015) Evaluation of appropriate  
649 reference genes for gene expression normalization during watermelon fruit development. PLoS  
650 one **10**: e0130865
- 651 **Kumagai MH, Donson J, Della-Cioppa G, Harvey D, Hanley K, Grill L** (1995) Cytoplasmic  
652 inhibition of carotenoid biosynthesis with virus-derived RNA. Proceedings of the National  
653 Academy of Sciences **92**: 1679-1683
- 654 **Lacomme C, Hrubikova K, Hein I** (2003) Enhancement of virus - induced gene silencing through  
655 viral - based production of inverted - repeats. The Plant Journal **34**: 543-553
- 656 **Liao JJ, Wang CH, Xing QJ, Li YP, Liu XF, Qi HY** (2019) Overexpression and VIGS system for  
657 functional gene validation in oriental melon (*Cucumis melo* var. *makuwa* Makino). Plant Cell,  
658 Tissue and Organ Culture (PCTOC) **137**: 275-284
- 659 **Liu E, Page JE** (2008) Optimized cDNA libraries for virus-induced gene silencing (VIGS) using  
660 tobacco rattle virus. Plant methods **4**: 5
- 661 **Liu L, Peng B, Zhang Z, Wu Y, Miras M, Aranda MA, Gu Q** (2017) Exploring different mutations  
662 at a single amino acid position of Cucumber green mottle mosaic virus replicase to attain  
663 stable symptom attenuation. Phytopathology **107**: 1080-1086
- 664 **Liu M, Liu L, Wu H, Kang B, Gu Q.** (2019). Mapping subgenomic promoter of coat protein gene of  
665 Cucumber green mottle mosaic virus. Journal of Integrative Agriculture. doi:  
666 10.1016/S2095-3119(19)62647-X
- 667 **Liu N, Xie K, Jia Q, Zhao J, Chen T, Li H, Wei X, Diao X, Hong Y, Liu Y** (2016) Foxtail mosaic  
668 virus-induced gene silencing in monocot plants. Plant physiology **171**: 1801-1807
- 669 **Liu Y, Schiff M, Dinesh - Kumar S** (2002) Virus - induced gene silencing in tomato. The Plant  
670 Journal **31**: 777-786
- 671 **Livak KJ, Schmittgen TD** (2001) Analysis of relative gene expression data using real-time  
672 quantitative PCR and the 2<sup>-</sup> ΔΔCT method. methods **25**: 402-408



- 673 **Lu R, Malcuit I, Moffett P, Ruiz MT, Peart J, Wu AJ, Rathjen JP, Bendahmane A, Day L,**  
674 **Baulcombe DC** (2003) High throughput virus - induced gene silencing implicates heat shock  
675 protein 90 in plant disease resistance. *The EMBO journal* **22**: 5690-5699
- 676 **Mei Y, Zhang C, Kernodle BM, Hill JH, Whitham SA** (2016) A Foxtail mosaic virus vector for  
677 virus-induced gene silencing in maize. *Plant physiology* **171**: 760-772
- 678 **Molnar A, Melnyk CW, Bassett A, Hardcastle TJ, Dunn R, Baulcombe DC** (2010) Small silencing  
679 RNAs in plants are mobile and direct epigenetic modification in recipient cells. *science* **328**:  
680 872-875
- 681 **Ooi A, Tan S, Mohamed R, Rahman NA, Othman RY** (2006) The full-length clone of cucumber  
682 green mottle mosaic virus and its application as an expression system for Hepatitis B surface  
683 antigen. *Journal of biotechnology* **121**: 471-481
- 684 **Palauqui JC, Elmayan T, Pollien JM, Vaucheret H** (1997) Systemic acquired silencing: transgene -  
685 specific post - transcriptional silencing is transmitted by grafting from silenced stocks to  
686 non - silenced scions. *The EMBO journal* **16**: 4738-4745
- 687 **Renner SS, Schaefer H** (2016) Phylogeny and evolution of the Cucurbitaceae. *In Genetics and*  
688 *genomics of Cucurbitaceae*. Springer, pp 13-23
- 689 **Ruiz MT, Voinnet O, Baulcombe DC** (1998) Initiation and maintenance of virus-induced gene  
690 silencing. *The Plant Cell* **10**: 937-946
- 691 **Ryu CM, Anand A, Kang L, Mysore KS** (2004) Agrodrench: a novel and effective agroinoculation  
692 method for virus - induced gene silencing in roots and diverse Solanaceous species. *The Plant*  
693 *Journal* **40**: 322-331
- 694 **Sempere RN, Gómez P, Truniger V, Aranda MA** (2011) Development of expression vectors based on  
695 pepino mosaic virus. *Plant Methods* **7**: 6
- 696 **Senthil-Kumar M, Mysore KS** (2011) New dimensions for VIGS in plant functional genomics.  
697 *Trends in plant science* **16**: 656-665
- 698 **Teoh P-G, Ooi A-S, AbuBakar S, Othman RY** (2009) Virus-specific read-through codon preference  
699 affects infectivity of chimeric cucumber green mottle mosaic viruses displaying a dengue  
700 virus epitope. *BioMed Research International* **2009**
- 701 **Tran HH, Chen B, Chen H, Menassa R, Hao X, Bernardis M, Hüner NP, Wang A** (2019)  
702 Development of a cucumber green mottle mosaic virus-based expression vector for the  
703 production in cucumber of neutralizing epitopes against a devastating animal virus. *Journal of*  
704 *virological methods* **269**: 18-25
- 705 **Ugaki M, Tomiyama M, Kakutani T, Hidaka S, Kiguchi T, Nagata R, Sato T, Motoyoshi F,**  
706 **Nishiguchi M** (1991) The complete nucleotide sequence of cucumber green mottle mosaic  
707 virus (SH strain) genomic RNA. *Journal of General Virology* **72**: 1487-1495
- 708 **Wang R, Yang X, Wang N, Liu X, Nelson RS, Li W, Fan Z, Zhou T** (2016) An efficient virus -  
709 induced gene silencing vector for maize functional genomics research. *The Plant Journal* **86**:  
710 102-115
- 711 **Zhang C, Bradshaw JD, Whitham SA, Hill JH** (2010) The development of an efficient multipurpose  
712 bean pod mottle virus viral vector set for foreign gene expression and RNA silencing. *Plant*  
713 *physiology* **153**: 52-65
- 714 **Zhang Z, Wang J, Zhang R, Huang R** (2012) The ethylene response factor AtERF98 enhances  
715 tolerance to salt through the transcriptional activation of ascorbic acid synthesis in  
716 *Arabidopsis*. *The Plant Journal* **71**: 273-287

- 717 **Zhao F, Lim S, Igori D, Yoo RH, Kwon S-Y, Moon JS** (2016) Development of tobacco ringspot  
718 virus-based vectors for foreign gene expression and virus-induced gene silencing in a variety  
719 of plants. *Virology* **492**: 166-178
- 720 **Zheng H, Xiao C, Han K, Peng J, Lin L, Lu Y, Xie L, Wu X, Xu P, Li G** (2015) Development of an  
721 agroinoculation system for full-length and GFP-tagged cDNA clones of cucumber green  
722 mottle mosaic virus. *Archives of virology* **160**: 2867-2872
- 723 **Zheng Y, Wu S, Bai Y, Sun H, Jiao C, Guo S, Zhao K, Blanca J, Zhang Z, Huang S** (2019)  
724 Cucurbit Genomics Database (CuGenDB): a central portal for comparative and functional  
725 genomics of cucurbit crops. *Nucleic acids research* **47**: D1128-D1136
- 726

**A** pV1a23

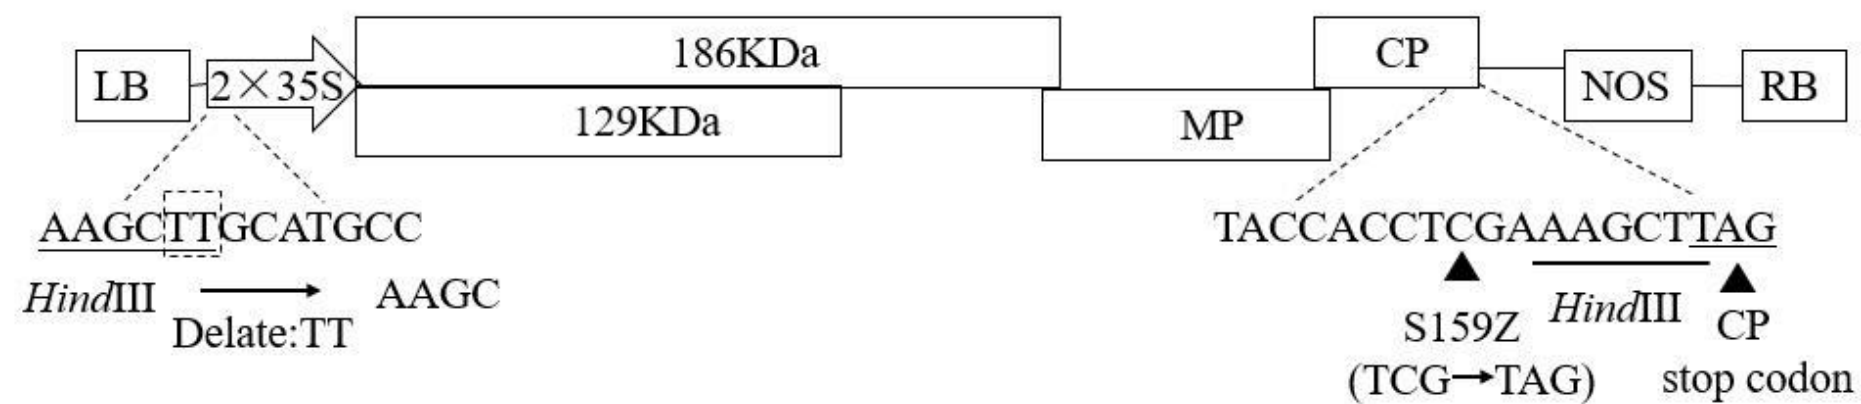

**B** pV1a23      pV1a23-PDS114      pXT1-CGMMV      CK

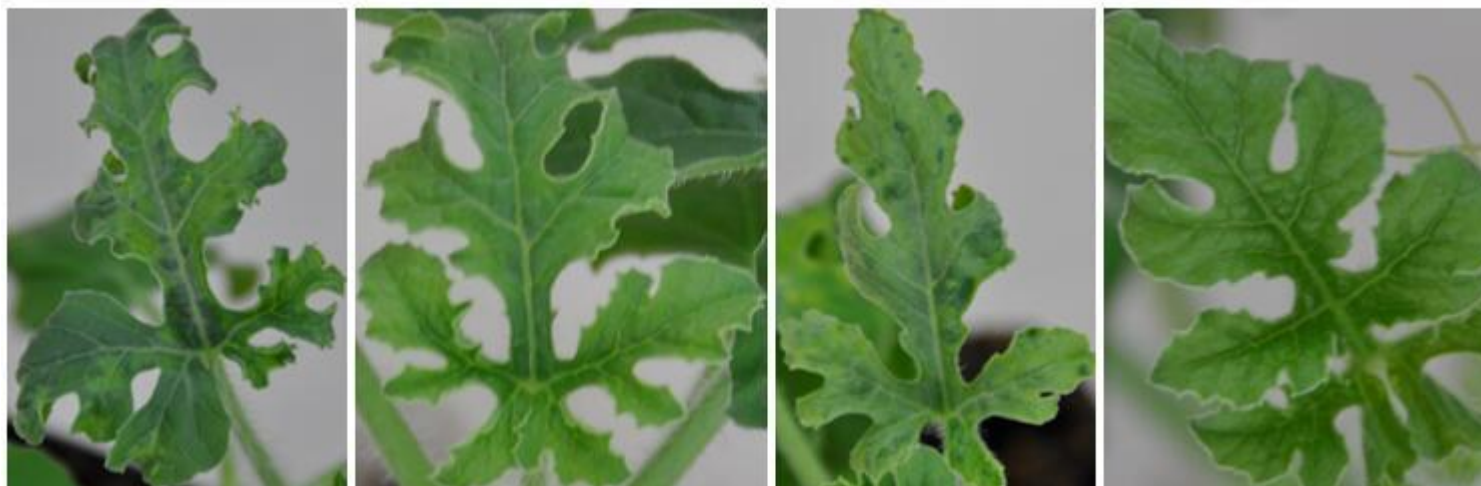

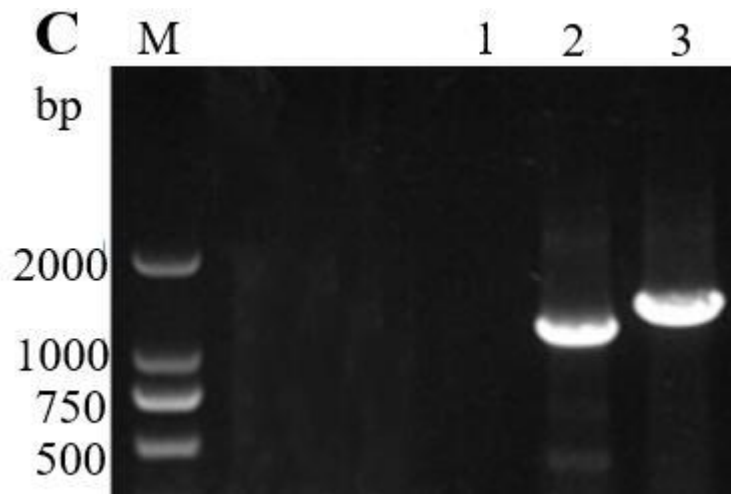

**Figure 1:** Engineering of CGMMV as a VIGS vector with an insertion site behind the CP. A, Schematic representation of the pV1a23 vector with a restriction enzyme site (*Hind*III) for insertion of gene fragments. B, Viral symptoms on upper non-inoculated leaves caused by pV1a23 similar to those of plants inoculated with the pXT1-CGMMV. Photobleaching was absent on plants inoculated with pV1a23-PDS114. C, RT-PCR detection of viral RNA from pV1a23 and pV1a23-PDS114 in watermelon. M: Marker2000; CK: negative control; 1, 2 and 3 indicate healthy control and plants inoculated with pV1a23 and pV1a23-PDS114, respectively.

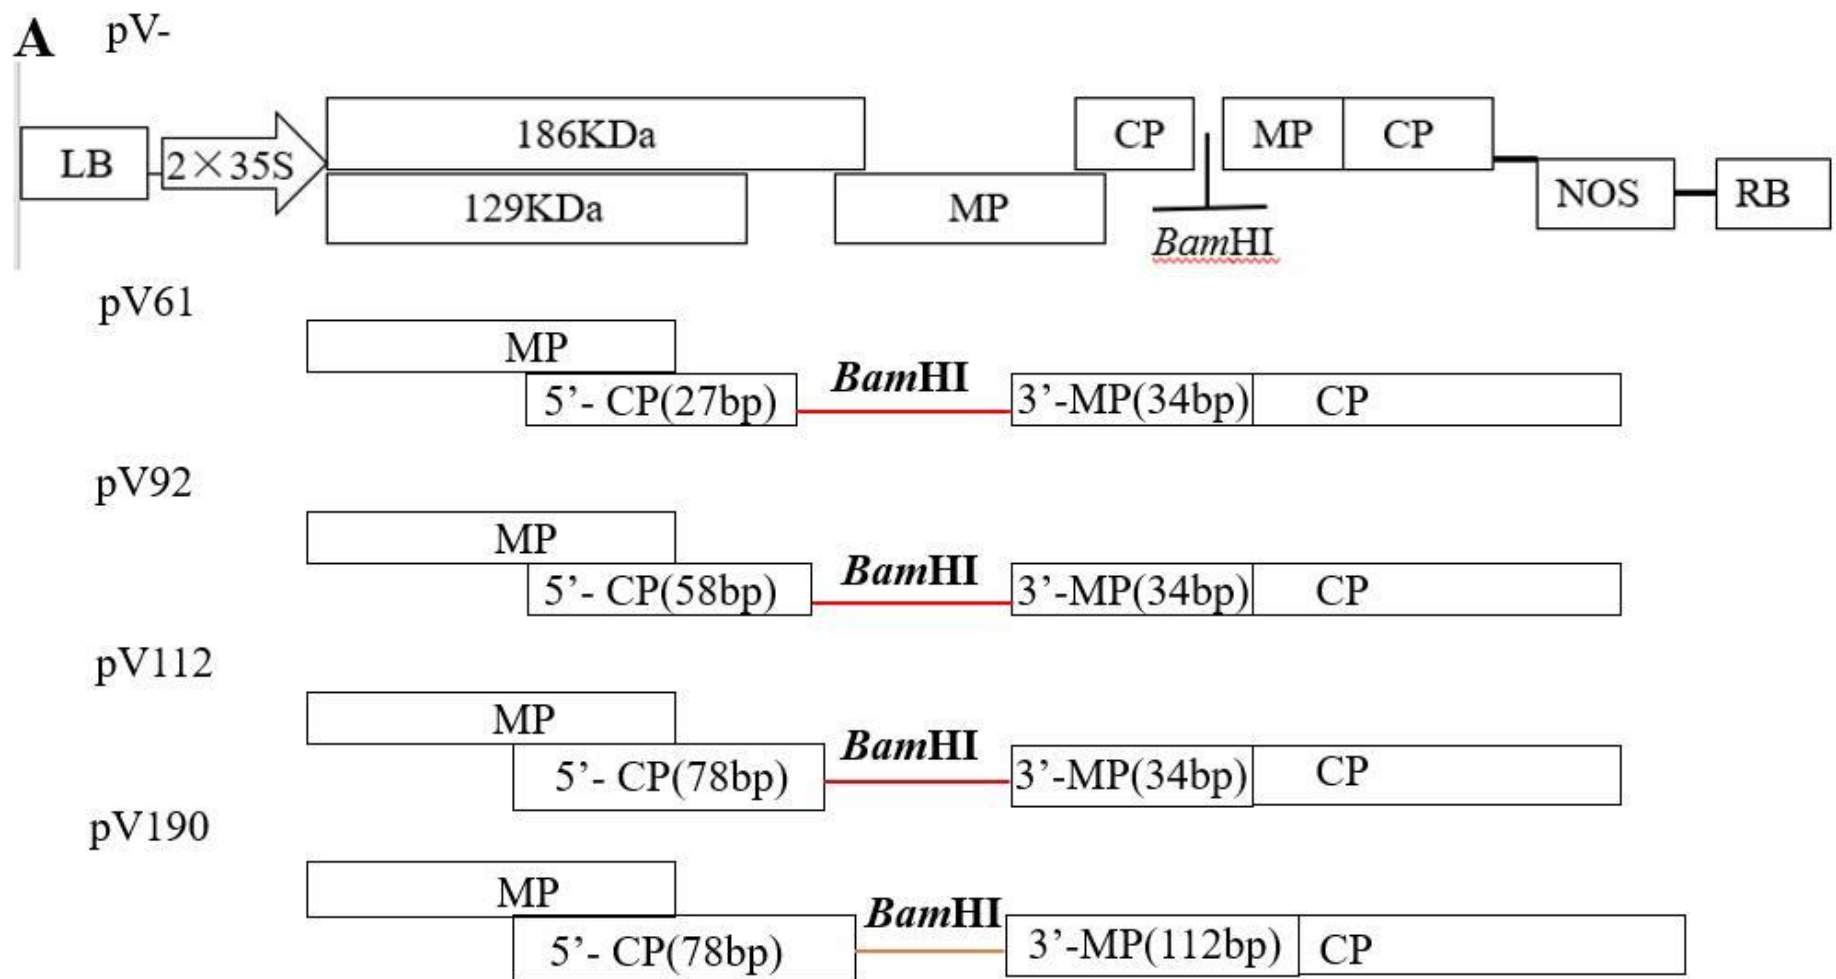

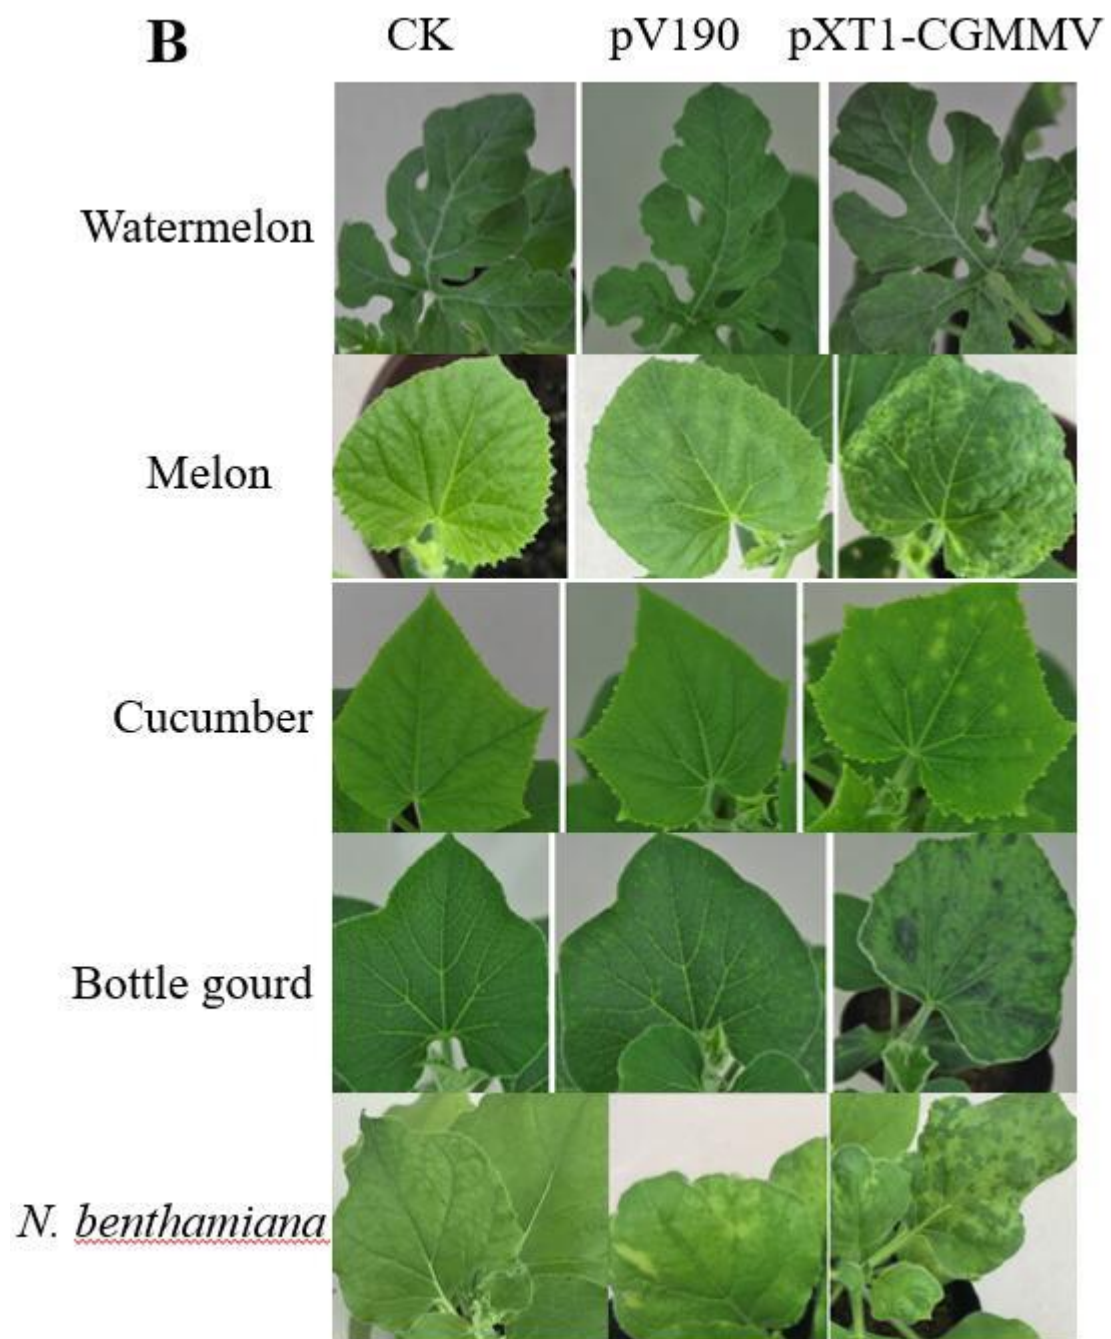

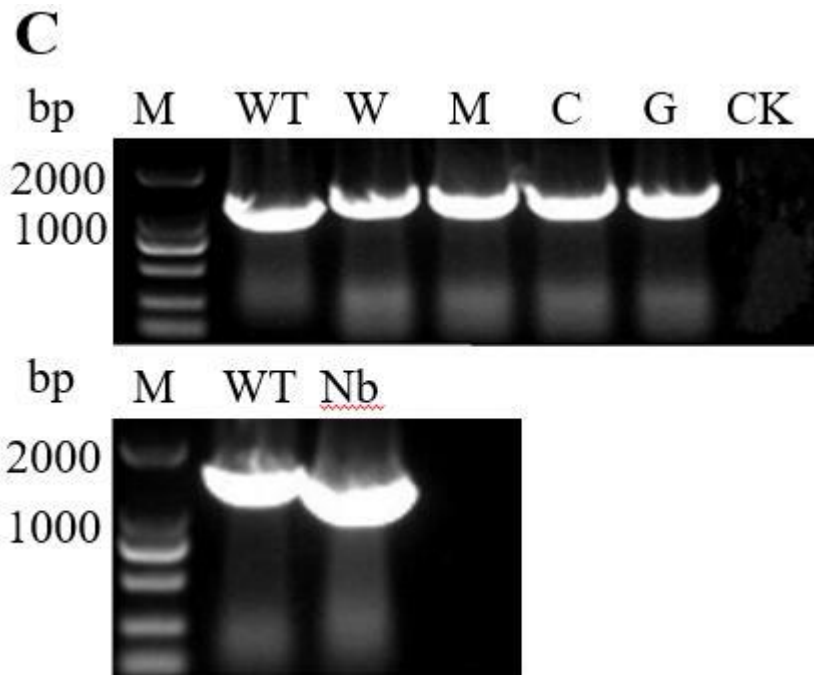

**Figure 2:** Engineering of CGMMV as a VIGS vector with different size CP subgenomic promoters. A, Schematic representation of pV61, pV92, pV112 and pV190. pV- is a pXT1-CGMMV derivative that contains a direct repeat of the 61-, 92-, 112- and 190-bp putative CGMMV CP subgenomic promoter and a restriction enzyme site (*Bam*HI) between CP subgenomic promoters. B, pV190 caused mild systemic symptoms on cucurbits and *N. benthamiana*. C, RT-PCR detection of viral RNA showing that pXT1-CGMMV and pV190 are infectious in cucurbits and *N. benthamiana*. M: Marker2000; WT: wild type (pXT1-CGMMV); CK: negative control; W, M, C, G and Nb indicate watermelon, melon, cucumber, bottle gourd and *N.benthamiana*, respectively.



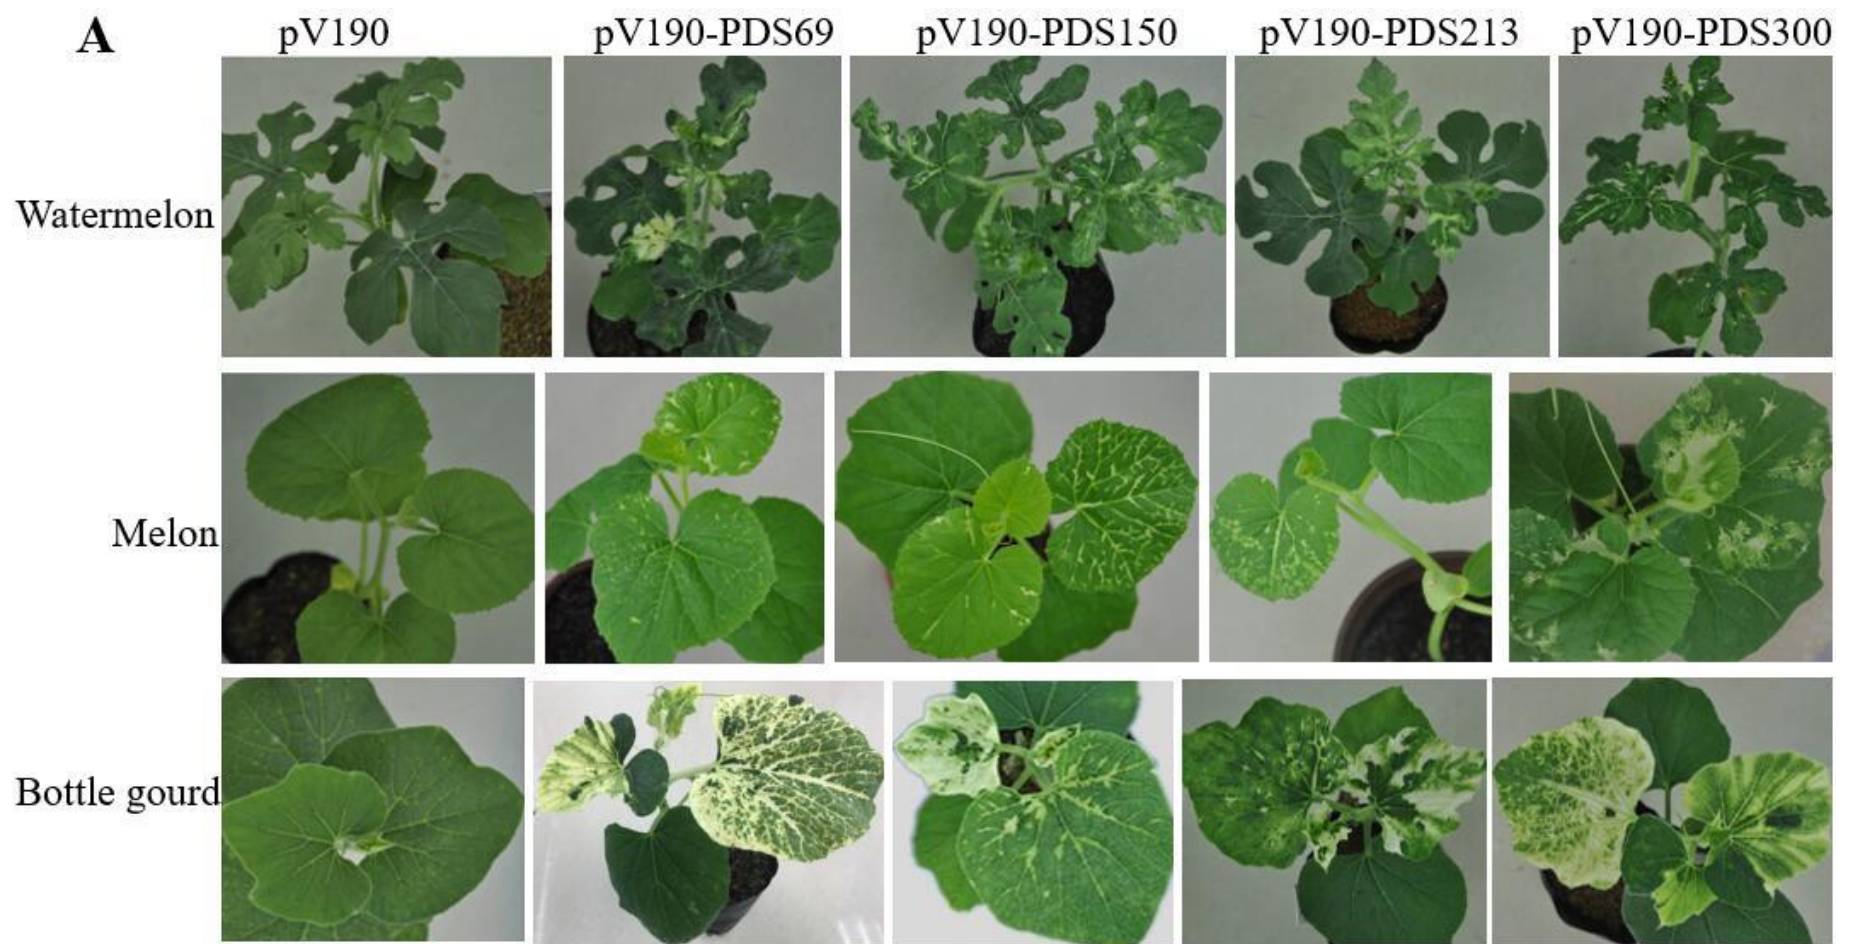

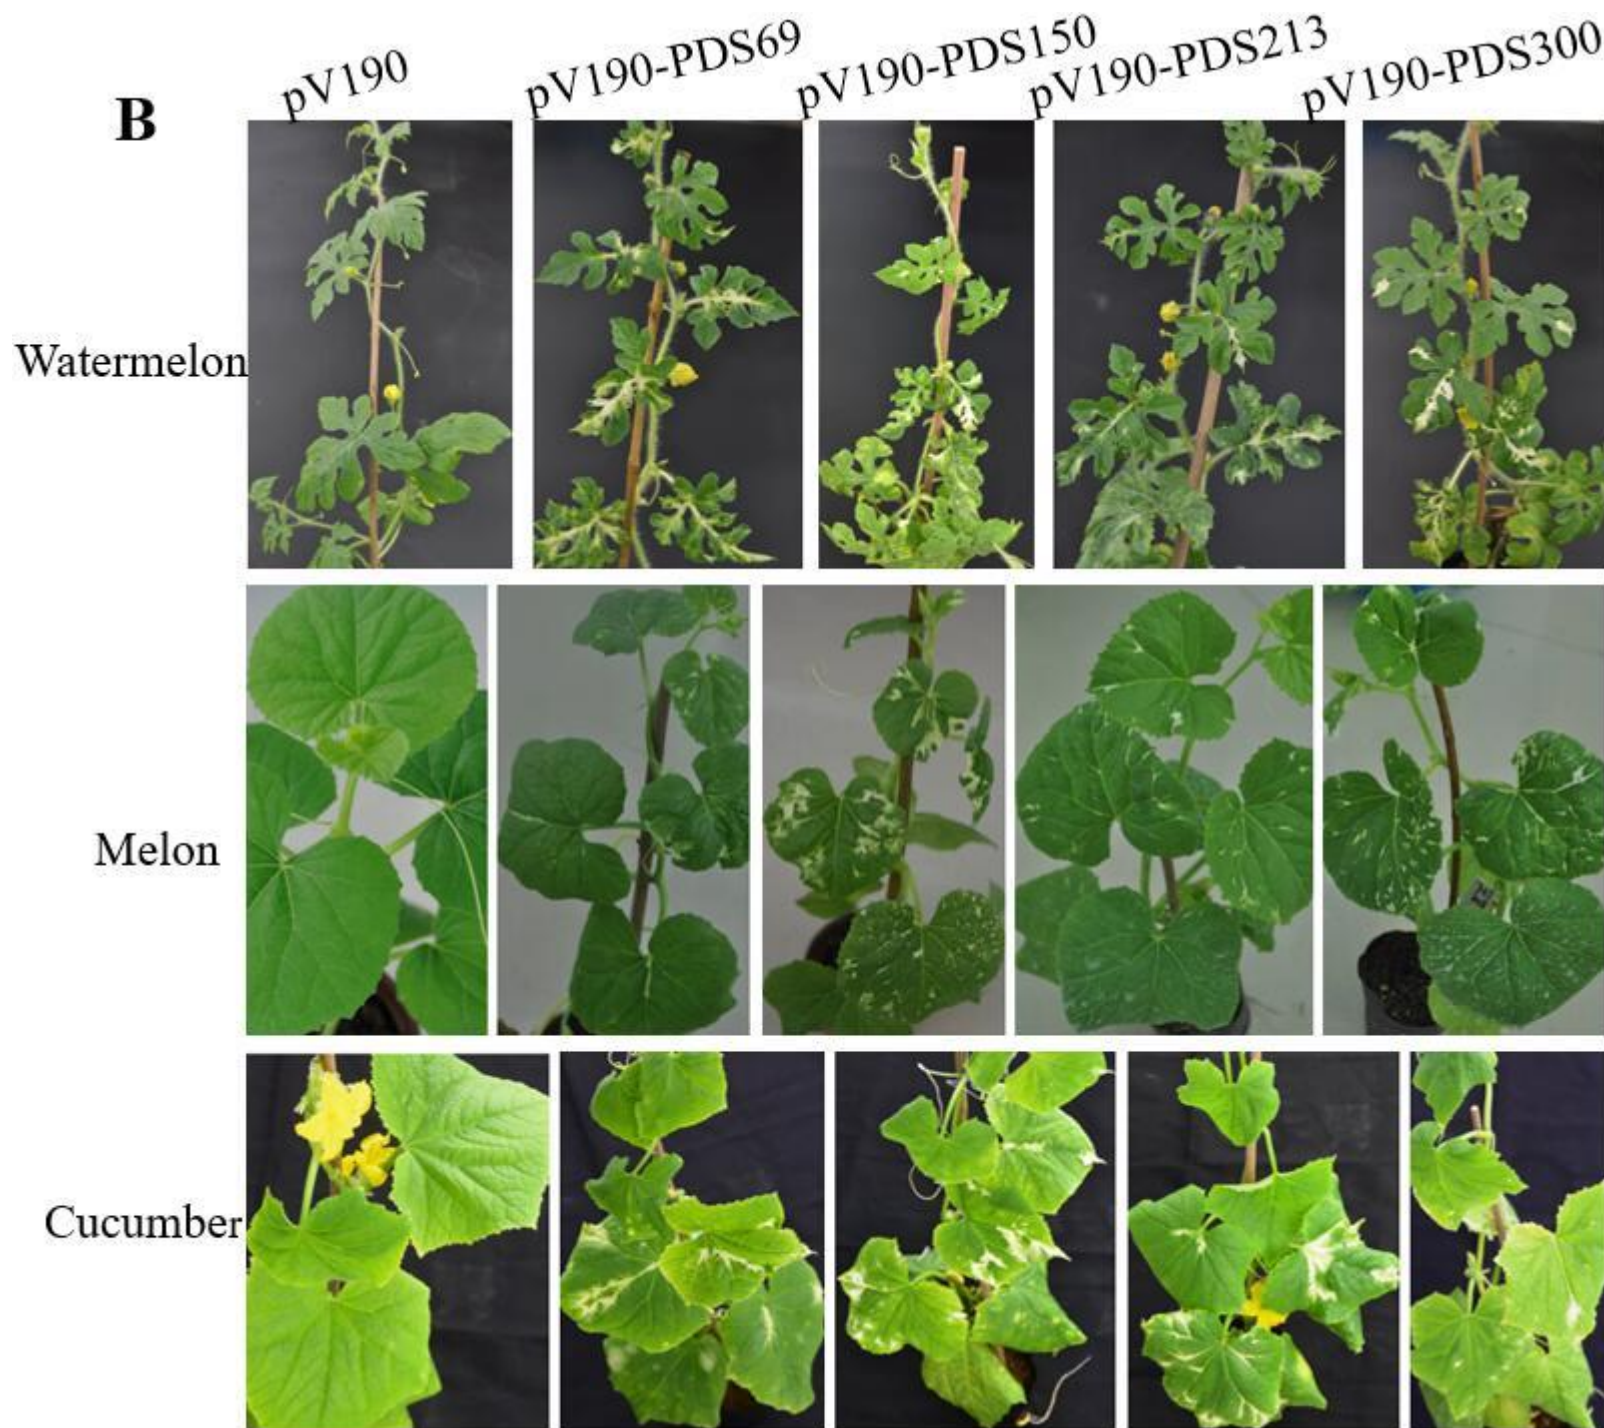

---

**Figure 3:** *PDS* silencing using the VIGS vectors pV190-PDS69, pV190-PDS150, pV190-PDS213 and pV190-PDS300. A, Photobleaching was first observed and photographed in watermelon at 19dpi, and in melon and bottle gourd plants at 12dpi. B, Photobleaching was photographed in watermelon at about 32 dpi, in melon at about 20 dpi and in cucumber at about 39 dpi, respectively.



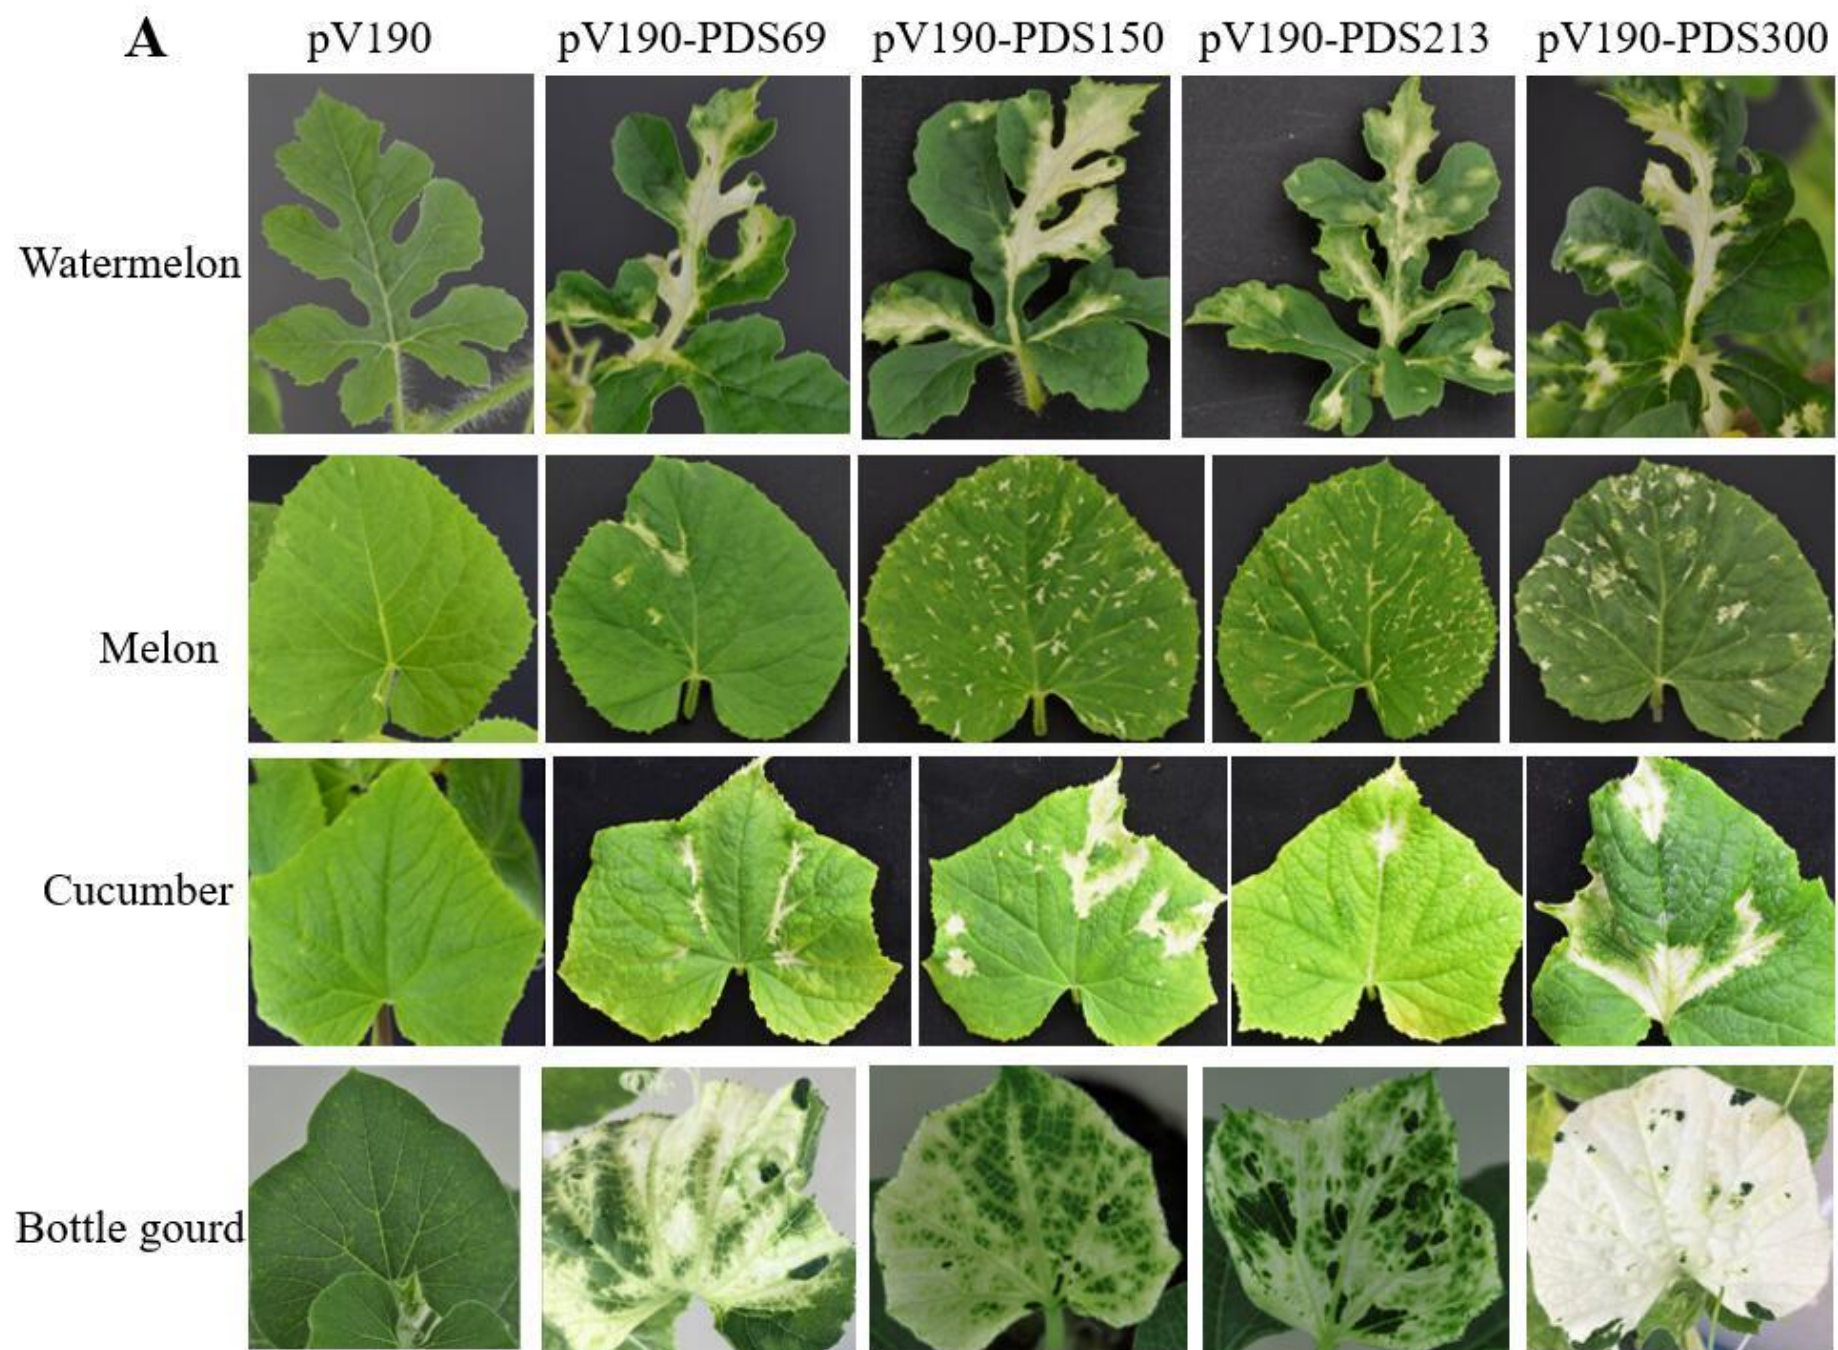

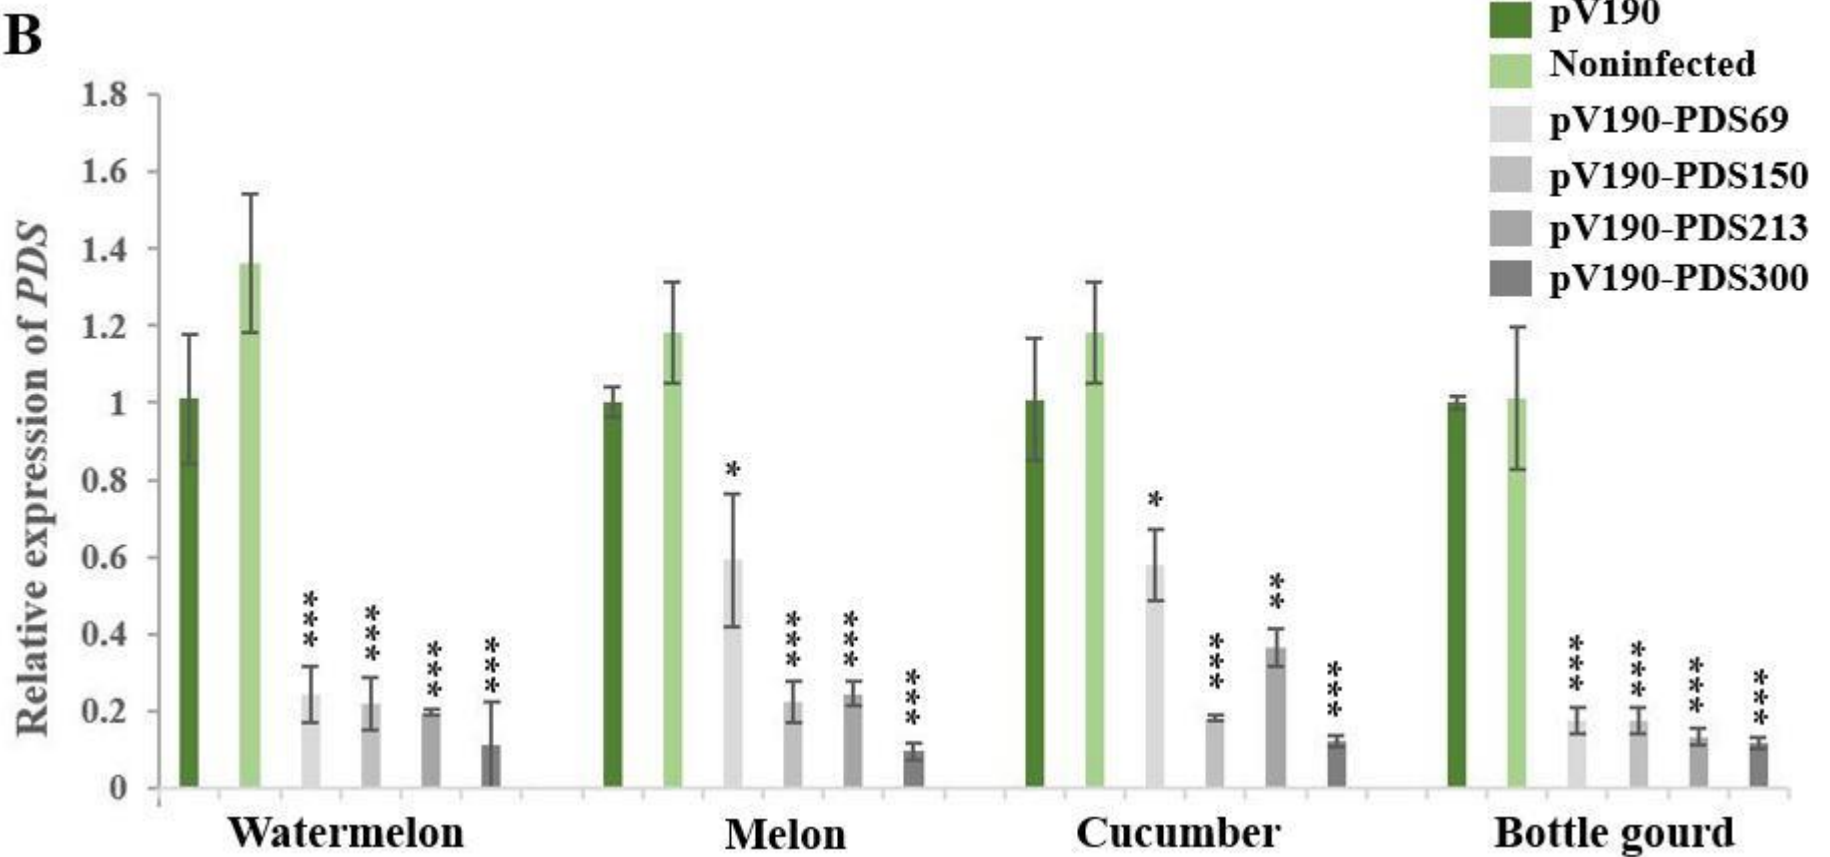

**Figure 4:** Silencing efficiency of VIGS vectors carrying *PDS* fragments of different sizes on cucurbits. A, indicate the uninoculated leaves displaying most obvious photobleaching on watermelon plants at 32 dpi, on melon at 27 dpi, on cucumber at 39 dpi and on bottle gourd at 34 dpi, respectively. B, Real-time qRT-PCR analysis of *PDS* expression in noninfected (NI), pV190 empty vector (EV), and CGMMV-PDS-infected cucurbit (watermelon, melon, cucumber and bottle gourd) plants. Three technical replicates were performed for each individual sample (\*,  $P < 0.05$  and \*\* $P < 0.01$  \*\*\* $P < 0.001$  compared with the empty vector (pV190) by Student's t test. Error bars indicate the SD.



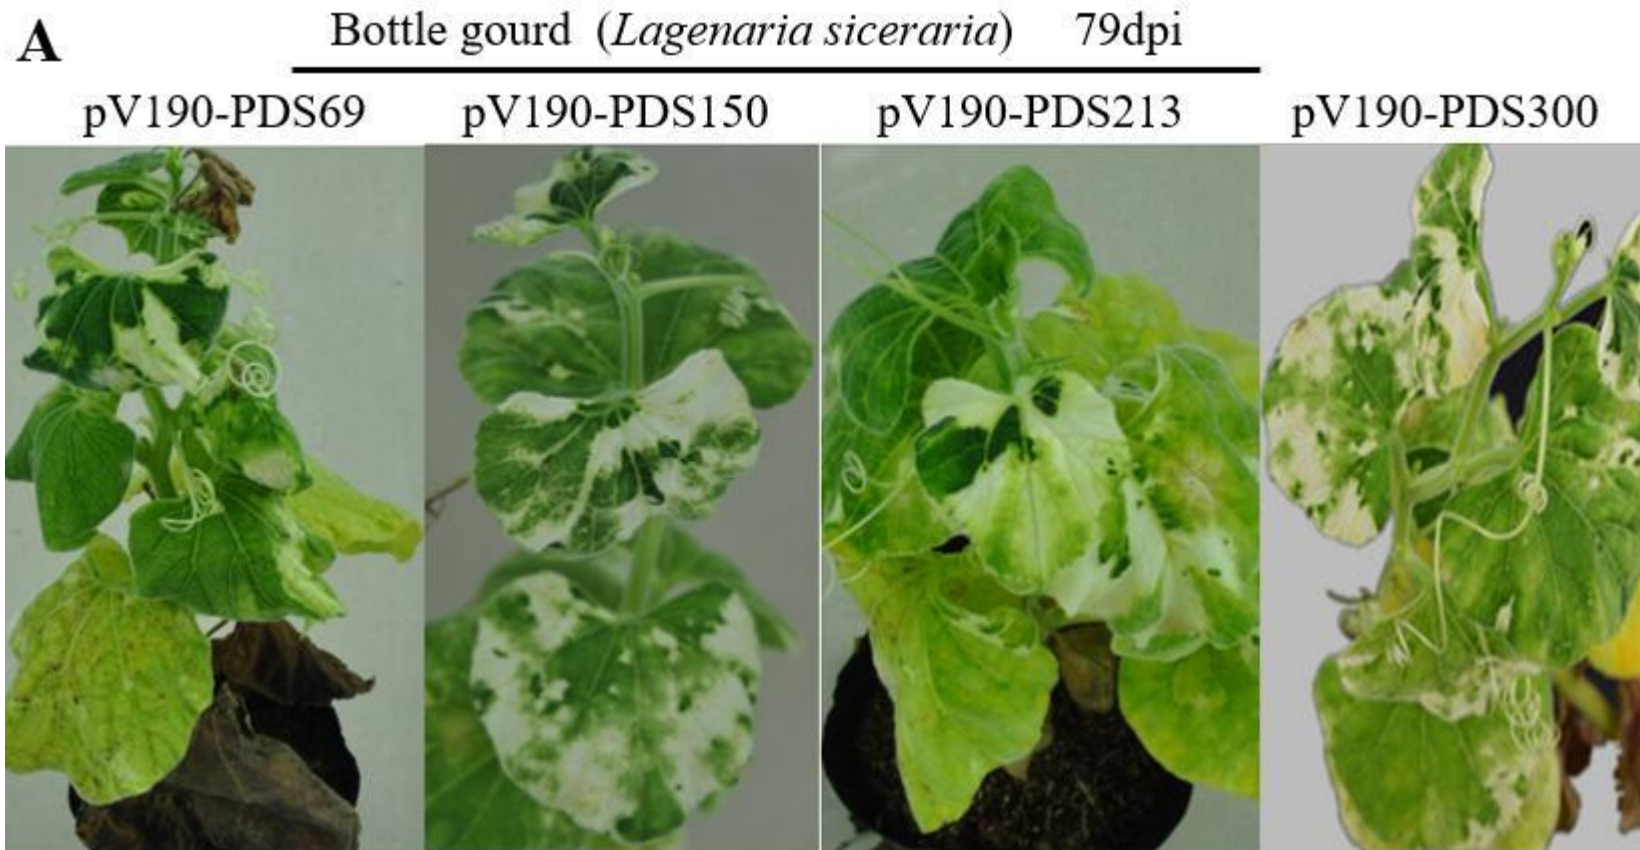

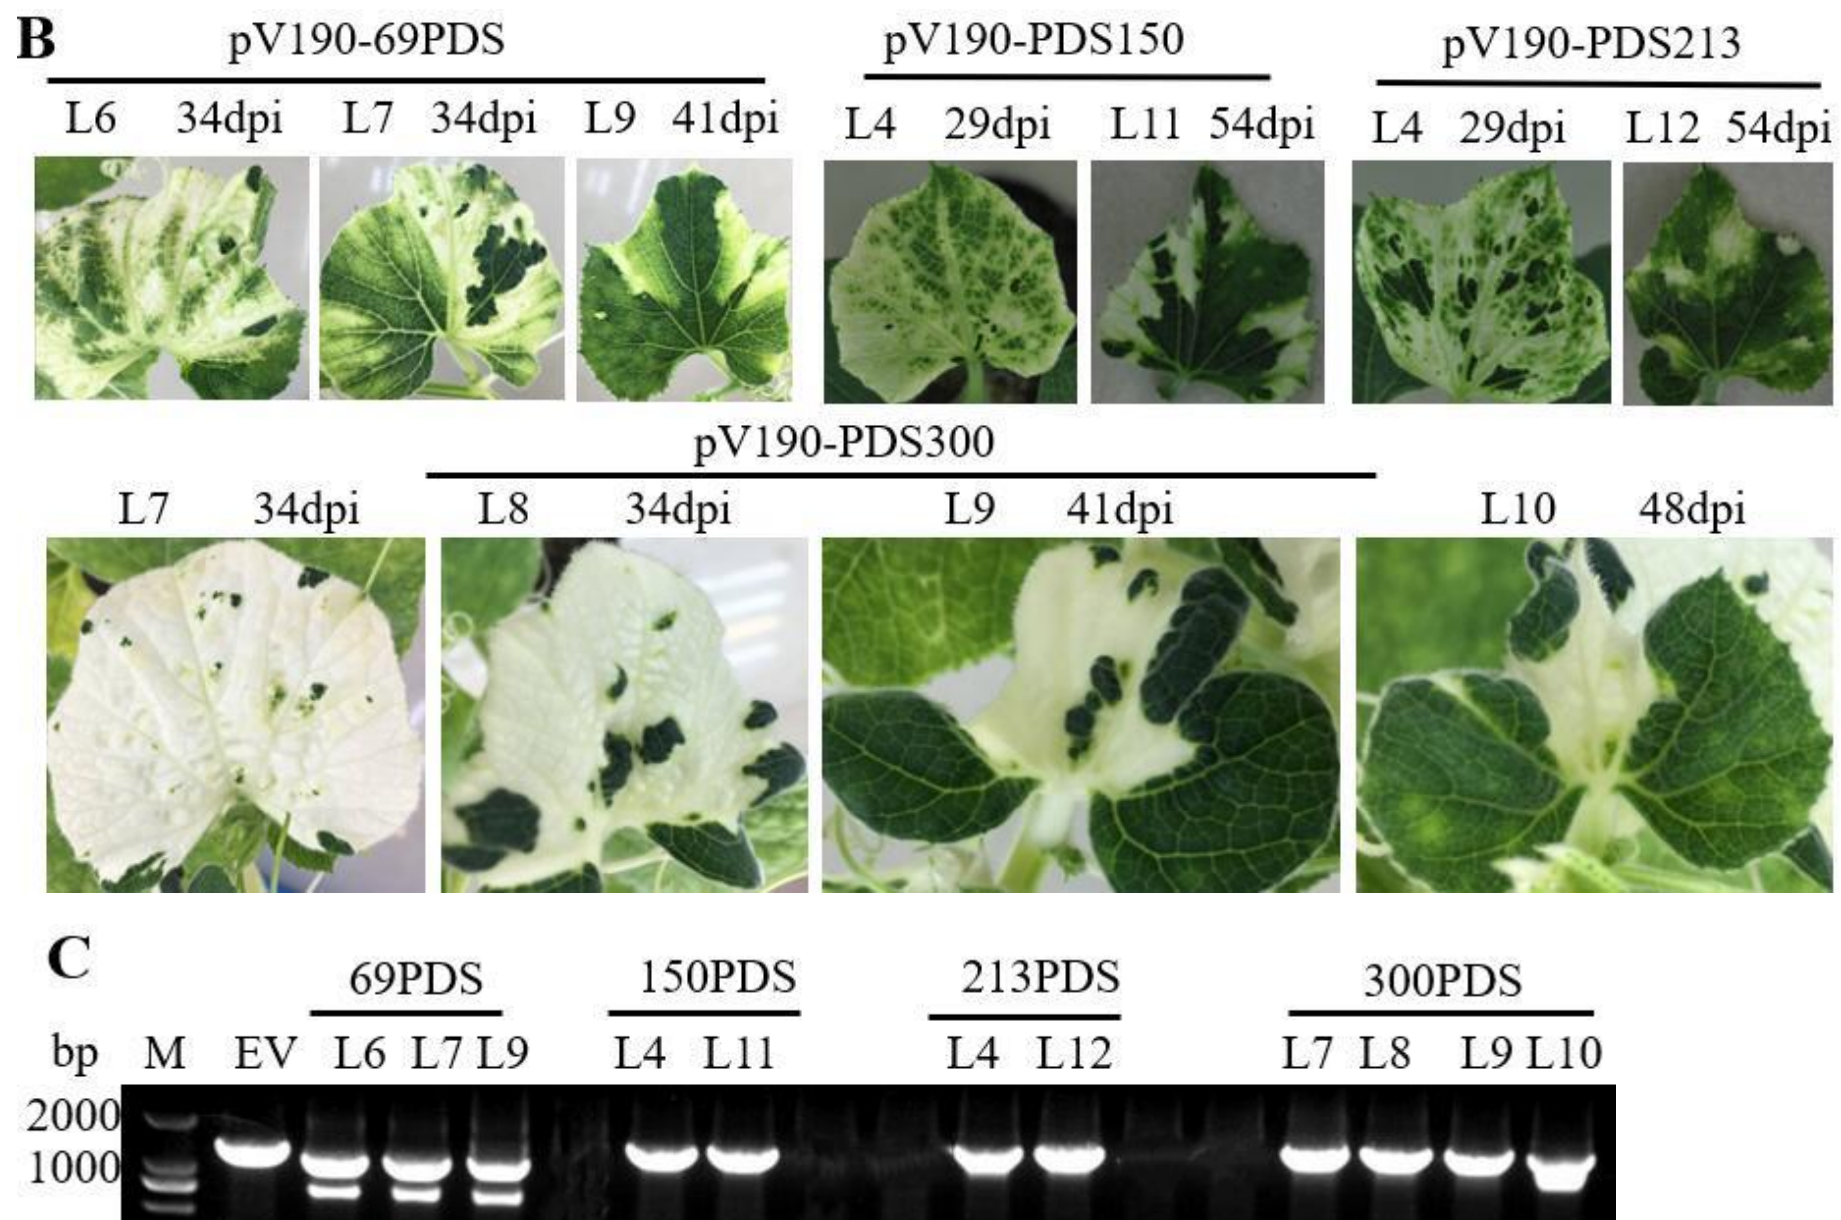



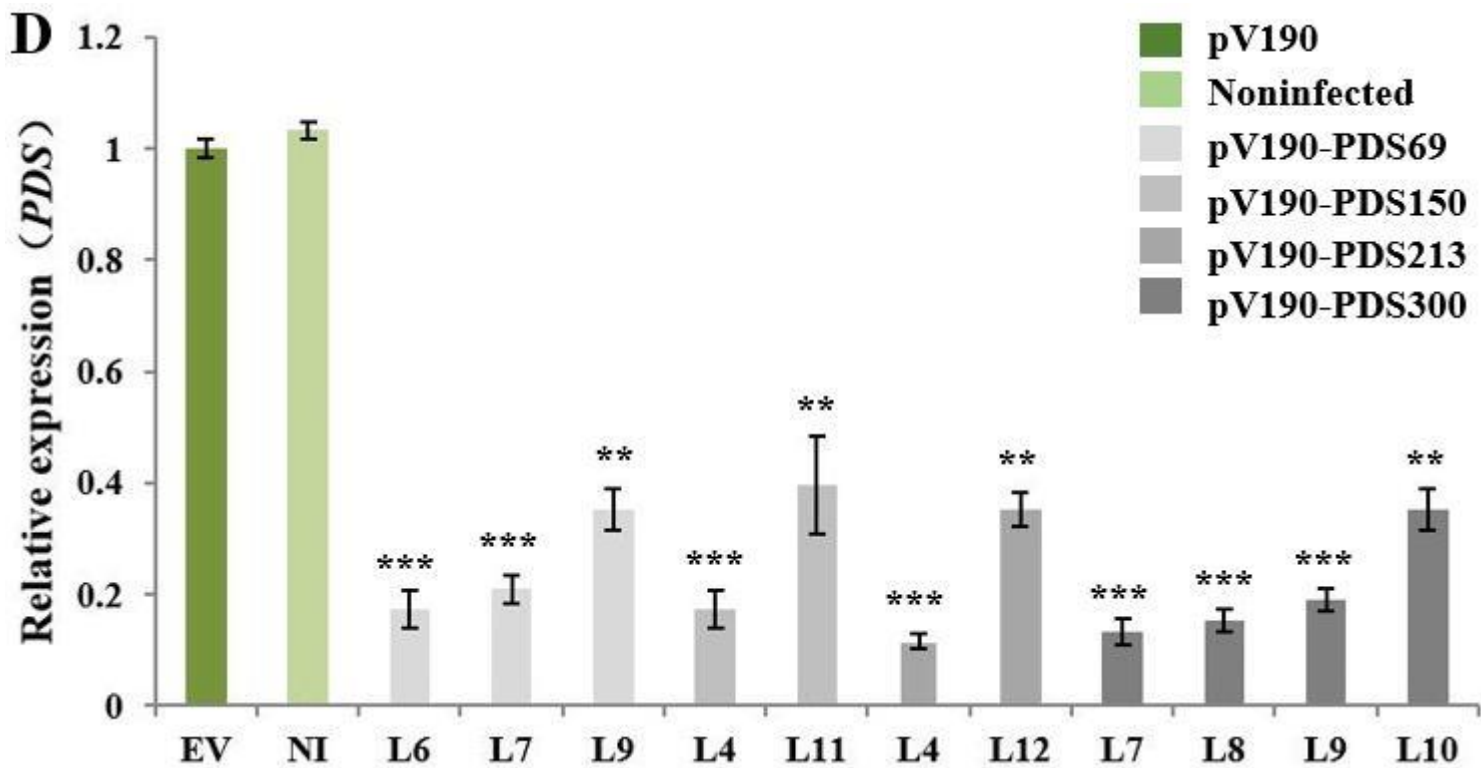

**Figure 5:** Silencing efficiency and stability of the pV190 VIGS vector with different length inserts in bottle gourd. Fragments of 69 bp (dsRNA hairpin structure), 150 bp, 213 bp, 300 bp were separately cloned into pV190. A, Silencing *PDS* using pV190 on bottle gourd plants produced photobleaching that persisted for over 70 days. B, Photobleaching on newly emerging leaves of bottle gourd plants caused by *PDS* silencing was observed at 29, 34, 41, 48 and 54 dpi, respectively. C, RT-PCR assay to detect the presence of pV190 carrying *PDS* fragments of different sizes in systemic leaves. Samples from the 4<sup>th</sup> leaf above the inoculated (L4) were collected at 29 dpi; L6, L7 and L8 samples were collected at 34 dpi, L9 sample was collected at 41 dpi, L10 at 48 dpi, L11 and L12 at 54 dpi. M: Marker2000; EV: Empty vector (pV190). D, Relative expression level of *PDS* mRNA in the above indicated leaves determined by real-time qRT-PCR.



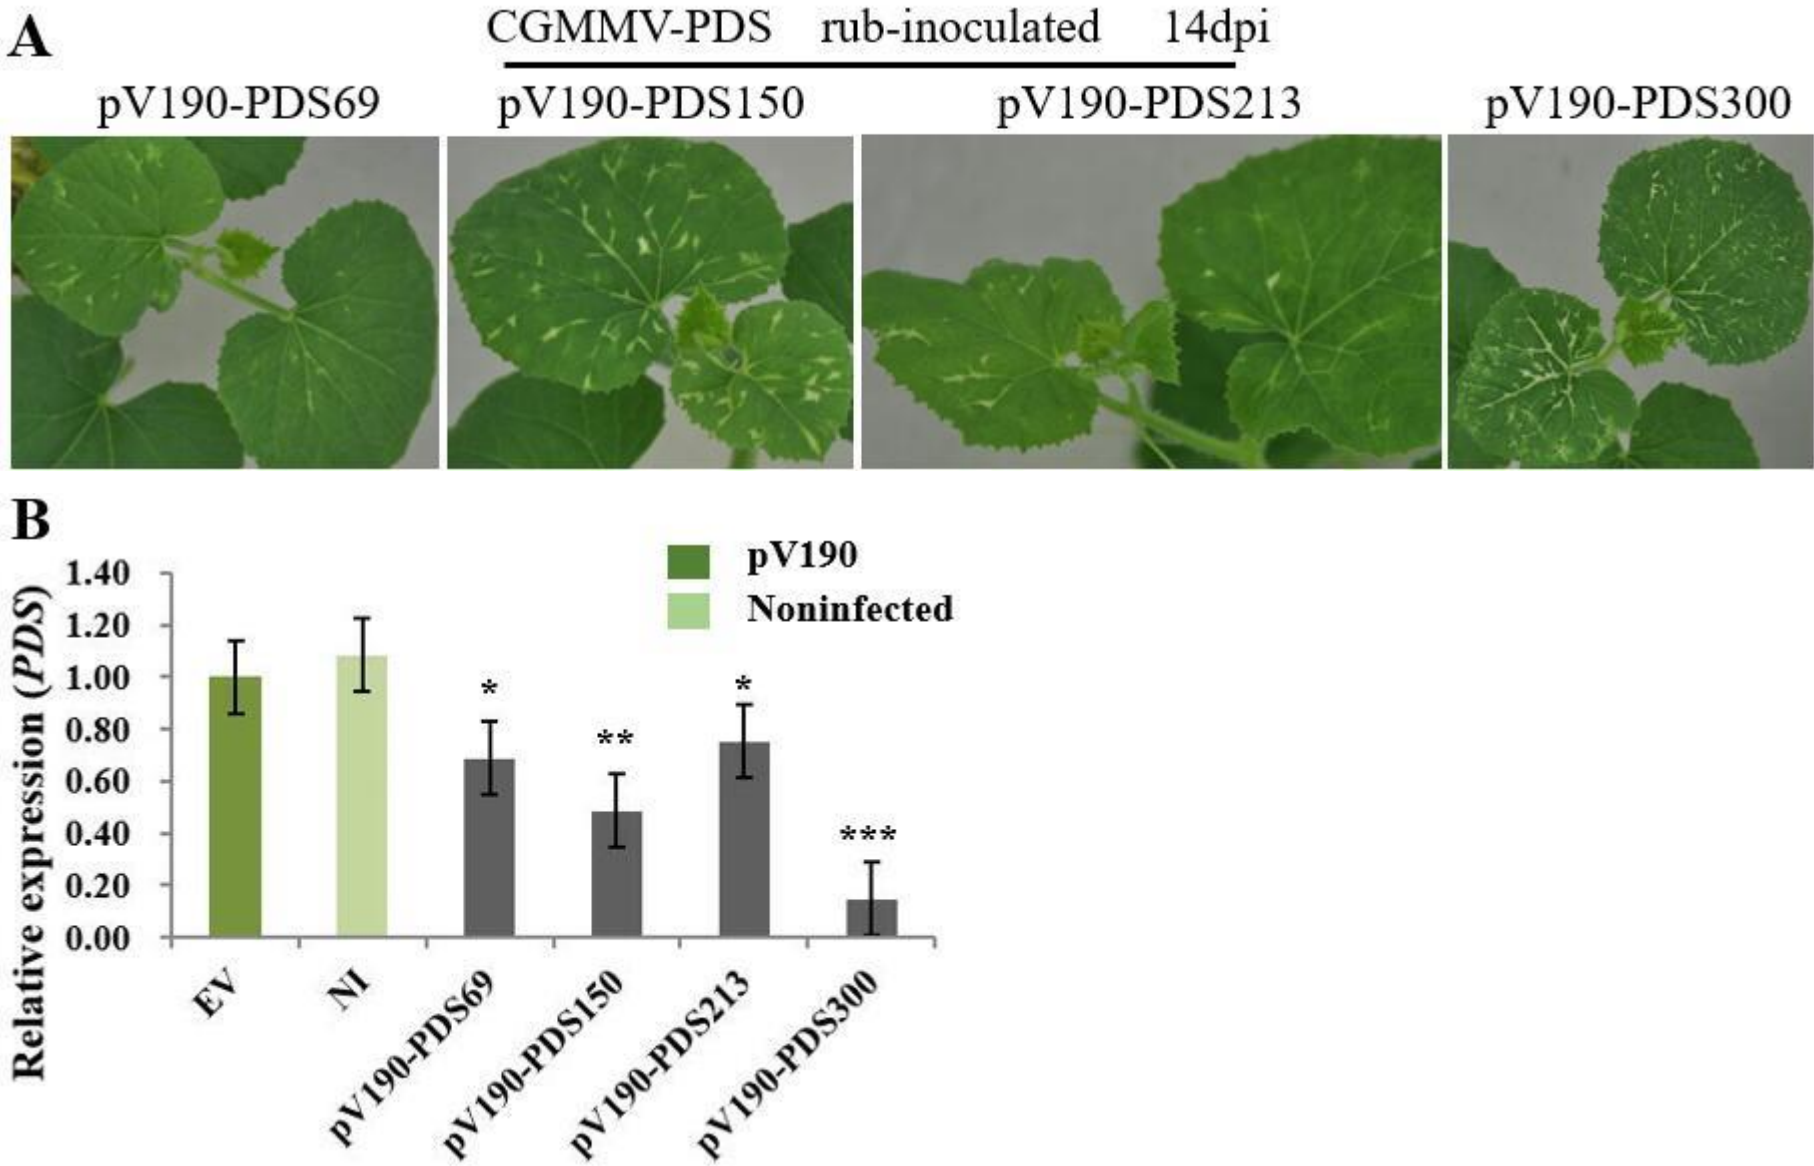

**Figure 6:** The silencing effect of pV190-PDS69, -PDS150, -PDS213 and -PDS300 could be passed. A, Photobleaching caused by *PDS*

---

silencing in systemic leaves of melon plants that were rub inoculated with sap from pV190-PDS69, -PDS150, -PDS213 and -PDS300-infected leaf tissue. The photobleaching phenotype was observed and photographed at 9dpi / 14dpi. B, Real-time qRT-PCR analysis of *PDS* expression in the 5<sup>th</sup> leaf above the inoculated (L5) of noninfected (NI), pV190 empty vector (EV), and pV190-PDS69, -PDS150, -PDS213 and -PDS300-infected melon by mechanical inoculation.

## Parsed Citations

**Alvarado VY, Scholthof HB (2012) AGO2: a new Argonaute compromising plant virus accumulation. *Frontiers in plant science* 2: 112**

Pubmed: [Author and Title](#)

Google Scholar: [Author Only](#) [Title Only](#) [Author and Title](#)

**Avesani L, Marconi G, Morandini F, Albertini E, Bruschetta M, Bortesi L, Pezzotti M, Porceddu A (2007) Stability of Potato virus X expression vectors is related to insert size: implications for replication models and risk assessment. *Transgenic research* 16: 587-597**

Pubmed: [Author and Title](#)

Google Scholar: [Author Only](#) [Title Only](#) [Author and Title](#)

**Baulcombe DC (1999) Fast forward genetics based on virus-induced gene silencing. *Current opinion in plant biology* 2: 109-113**

Pubmed: [Author and Title](#)

Google Scholar: [Author Only](#) [Title Only](#) [Author and Title](#)

**Bouché N, Laressergues D, Gasciolli V, Vaucheret H (2006) An antagonistic function for Arabidopsis DCL2 in development and a new function for DCL4 in generating viral siRNAs. *The EMBO journal* 25: 3347-3356**

Pubmed: [Author and Title](#)

Google Scholar: [Author Only](#) [Title Only](#) [Author and Title](#)

**Bu R, Wang R, Wei Q, Hu H, Sun H, Song P, Yu Y, Liu Q, Zheng Z, Li T (2019) Silencing of glycerol-3-phosphate acyltransferase 6 (GPAT6) gene using a newly established virus induced gene silencing (VIGS) system in cucumber alleviates autotoxicity mimicked by cinnamic acid (CA). *Plant and Soil* 438: 329-346**

Pubmed: [Author and Title](#)

Google Scholar: [Author Only](#) [Title Only](#) [Author and Title](#)

**Burch-Smith TM, Anderson JC, Martin GB, Dinesh-Kumar SP (2004) Applications and advantages of virus-induced gene silencing for gene function studies in plants. *The Plant Journal* 39: 734-746**

Pubmed: [Author and Title](#)

Google Scholar: [Author Only](#) [Title Only](#) [Author and Title](#)

**Choi PS, Soh WY, Kim YS, Yoo OJ, Liu JR (1994) Genetic transformation and plant regeneration of watermelon using *Agrobacterium tumefaciens*. *Plant cell reports* 13: 344-348**

Pubmed: [Author and Title](#)

Google Scholar: [Author Only](#) [Title Only](#) [Author and Title](#)

**Dickmeis C, Fischer R, Commandeur U (2014) Potato virus X-based expression vectors are stabilized for long-term production of proteins and larger inserts. *Biotechnology journal* 9: 1369-1379**

Pubmed: [Author and Title](#)

Google Scholar: [Author Only](#) [Title Only](#) [Author and Title](#)

**Ding XS, Schneider WL, Chaluvadi SR, Mian MR, Nelson RS (2006) Characterization of a Brome mosaic virus strain and its use as a vector for gene silencing in monocotyledonous hosts. *Molecular Plant-Microbe Interactions* 19: 1229-1239**

Pubmed: [Author and Title](#)

Google Scholar: [Author Only](#) [Title Only](#) [Author and Title](#)

**Dombrovsky A, Tran-Nguyen LT, Jones RA (2017) Cucumber green mottle mosaic virus: rapidly increasing global distribution, etiology, epidemiology, and management. *Annual review of phytopathology* 55: 231-256**

Pubmed: [Author and Title](#)

Google Scholar: [Author Only](#) [Title Only](#) [Author and Title](#)

**Donaire L, Barajas D, Martínez-García B, Martínez-Priego L, Pagán I, Llave C (2008) Structural and genetic requirements for the biogenesis of tobacco rattle virus-derived small interfering RNAs. *Journal of virology* 82: 5167-5177**

Pubmed: [Author and Title](#)

Google Scholar: [Author Only](#) [Title Only](#) [Author and Title](#)

**Dunoyer P, Himber C, Voinnet O (2005) DICER-LIKE 4 is required for RNA interference and produces the 21-nucleotide small interfering RNA component of the plant cell-to-cell silencing signal. *Nature genetics* 37: 1356**

Pubmed: [Author and Title](#)

Google Scholar: [Author Only](#) [Title Only](#) [Author and Title](#)

**Fu DQ, Zhu BZ, Zhu HL, Jiang WB, Luo YB (2005) Virus-induced gene silencing in tomato fruit. *The Plant Journal* 43: 299-308**

Pubmed: [Author and Title](#)

Google Scholar: [Author Only](#) [Title Only](#) [Author and Title](#)

**Garcia-Mas J, Benjak A, Sanseverino W, Bourgeois M, Mir G, González VM, Hénaff E, Câmara F, Cozzuto L, Lowy E (2012) The genome of melon (*Cucumis melo* L.). *Proceedings of the National Academy of Sciences* 109: 11872-11877**

Pubmed: [Author and Title](#)

Google Scholar: [Author Only](#) [Title Only](#) [Author and Title](#)

**Grumet R, Garcia-Mas J, Katzir N (2017) Cucurbit genetics and genomics: a look to the future. In *Genetics and Genomics of Cucurbitaceae*. Springer, pp 409-415**

Pubmed: [Author and Title](#)

Google Scholar: [Author Only](#) [Title Only](#) [Author and Title](#)

- Guo S, Zhang J, Sun H, Salse J, Lucas WJ, Zhang H, Zheng Y, Mao L, Ren Y, Wang Z (2013) The draft genome of watermelon (*Citrullus lanatus*) and resequencing of 20 diverse accessions. *Nature genetics* 45: 51**  
Pubmed: [Author and Title](#)  
Google Scholar: [Author Only](#) [Title Only](#) [Author and Title](#)
- Holzberg S, Brosio P, Gross C, Pogue GP (2002) Barley stripe mosaic virus-induced gene silencing in a monocot plant. *The Plant Journal* 30: 315-327**  
Pubmed: [Author and Title](#)  
Google Scholar: [Author Only](#) [Title Only](#) [Author and Title](#)
- Huang S, Li R, Zhang Z, Li L, Gu X, Fan W, Lucas WJ, Wang X, Xie B, Ni P (2009) The genome of the cucumber, *Cucumis sativus* L. *Nature genetics* 41: 1275**  
Pubmed: [Author and Title](#)  
Google Scholar: [Author Only](#) [Title Only](#) [Author and Title](#)
- Igarashi A, Yamagata K, Sugai T, Takahashi Y, Sugawara E, Tamura A, Yaegashi H, Yamagishi N, Takahashi T, Isogai M (2009) Apple latent spherical virus vectors for reliable and effective virus-induced gene silencing among a broad range of plants including tobacco, tomato, *Arabidopsis thaliana*, cucurbits, and legumes. *Virology* 386: 407-416**  
Pubmed: [Author and Title](#)  
Google Scholar: [Author Only](#) [Title Only](#) [Author and Title](#)
- Jailani AAK, Solanki V, Roy A, Sivasudha T, Mandal B (2017) A CGMMV genome-replicon vector with partial sequences of coat protein gene efficiently expresses GFP in *Nicotiana benthamiana*. *Virus research* 233: 77-85**  
Pubmed: [Author and Title](#)  
Google Scholar: [Author Only](#) [Title Only](#) [Author and Title](#)
- Kong Q, Yuan J, Gao L, Zhao L, Cheng F, Huang Y, Bie Z (2015) Evaluation of appropriate reference genes for gene expression normalization during watermelon fruit development. *PLoS one* 10: e0130865**  
Pubmed: [Author and Title](#)  
Google Scholar: [Author Only](#) [Title Only](#) [Author and Title](#)
- Kumagai MH, Donson J, Della-Cioppa G, Harvey D, Hanley K, Grill L (1995) Cytoplasmic inhibition of carotenoid biosynthesis with virus-derived RNA. *Proceedings of the National Academy of Sciences* 92: 1679-1683**  
Pubmed: [Author and Title](#)  
Google Scholar: [Author Only](#) [Title Only](#) [Author and Title](#)
- Lacomme C, Hrubikova K, Hein I (2003) Enhancement of virus-induced gene silencing through viral-based production of inverted-repeats. *The Plant Journal* 34: 543-553**  
Pubmed: [Author and Title](#)  
Google Scholar: [Author Only](#) [Title Only](#) [Author and Title](#)
- Liao JJ, Wang CH, Xing QJ, Li YP, Liu XF, Qi HY (2019) Overexpression and VIGS system for functional gene validation in oriental melon (*Cucumis melo* var. *akuwa* Makino). *Plant Cell, Tissue and Organ Culture (PCTOC)* 137: 275-284**  
Pubmed: [Author and Title](#)  
Google Scholar: [Author Only](#) [Title Only](#) [Author and Title](#)
- Liu E, Page JE (2008) Optimized cDNA libraries for virus-induced gene silencing (VIGS) using tobacco rattle virus. *Plant methods* 4: 5**  
Pubmed: [Author and Title](#)  
Google Scholar: [Author Only](#) [Title Only](#) [Author and Title](#)
- Liu L, Peng B, Zhang Z, Wu Y, Miras M, Aranda MA, Gu Q (2017) Exploring different mutations at a single amino acid position of Cucumber green mottle mosaic virus replicase to attain stable symptom attenuation. *Phytopathology* 107: 1080-1086**  
Pubmed: [Author and Title](#)  
Google Scholar: [Author Only](#) [Title Only](#) [Author and Title](#)
- Liu M, Liu L, Wu H, Kang B, Gu Q. (2019). Mapping subgenomic promoter of coat protein gene of Cucumber green mottle mosaic virus. *Journal of Integrative Agriculture*. doi: 10.1016/S2095-3119(19)62647-X**  
Pubmed: [Author and Title](#)  
Google Scholar: [Author Only](#) [Title Only](#) [Author and Title](#)
- Liu N, Xie K, Jia Q, Zhao J, Chen T, Li H, Wei X, Diao X, Hong Y, Liu Y (2016) Foxtail mosaic virus-induced gene silencing in monocot plants. *Plant physiology* 171: 1801-1807**  
Pubmed: [Author and Title](#)  
Google Scholar: [Author Only](#) [Title Only](#) [Author and Title](#)
- Liu Y, Schiff M, Dinesh-Kumar S (2002) Virus-induced gene silencing in tomato. *The Plant Journal* 31: 777-786**  
Pubmed: [Author and Title](#)  
Google Scholar: [Author Only](#) [Title Only](#) [Author and Title](#)
- Livak KJ, Schmittgen TD (2001) Analysis of relative gene expression data using real-time quantitative PCR and the 2<sup>-</sup>ΔΔCT method. *methods* 25: 402-408**  
Pubmed: [Author and Title](#)  
Google Scholar: [Author Only](#) [Title Only](#) [Author and Title](#)

Lu R, Malcuit I, Moffett P, Ruiz MT, Peart J, Wu AJ, Rathjen JP, Bendahmane A, Day L, Baulcombe DC (2003) High throughput virus-induced gene silencing implicates heat shock protein 90 in plant disease resistance. *The EMBO journal* 22: 5690-5699

Pubmed: [Author and Title](#)

Google Scholar: [Author Only](#) [Title Only](#) [Author and Title](#)

Mei Y, Zhang C, Kernodle BM, Hill JH, Whitham SA (2016) A Foxtail mosaic virus vector for virus-induced gene silencing in maize. *Plant physiology* 171: 760-772

Pubmed: [Author and Title](#)

Google Scholar: [Author Only](#) [Title Only](#) [Author and Title](#)

Molnar A, Melnyk CW, Bassett A, Hardcastle TJ, Dunn R, Baulcombe DC (2010) Small silencing RNAs in plants are mobile and direct epigenetic modification in recipient cells. *science* 328: 872-875

Pubmed: [Author and Title](#)

Google Scholar: [Author Only](#) [Title Only](#) [Author and Title](#)

Ooi A, Tan S, Mohamed R, Rahman NA, Othman RY (2006) The full-length clone of cucumber green mottle mosaic virus and its application as an expression system for Hepatitis B surface antigen. *Journal of biotechnology* 121: 471-481

Pubmed: [Author and Title](#)

Google Scholar: [Author Only](#) [Title Only](#) [Author and Title](#)

Palauqui JC, Elmayan T, Pollien JM, Vaucheret H (1997) Systemic acquired silencing: transgene-specific post-transcriptional silencing is transmitted by grafting from silenced stocks to non-silenced scions. *The EMBO journal* 16: 4738-4745

Pubmed: [Author and Title](#)

Google Scholar: [Author Only](#) [Title Only](#) [Author and Title](#)

Renner SS, Schaefer H (2016) Phylogeny and evolution of the Cucurbitaceae. In *Genetics and genomics of Cucurbitaceae*. Springer, pp 13-23

Pubmed: [Author and Title](#)

Google Scholar: [Author Only](#) [Title Only](#) [Author and Title](#)

Ruiz MT, Voinnet O, Baulcombe DC (1998) Initiation and maintenance of virus-induced gene silencing. *The Plant Cell* 10: 937-946

Pubmed: [Author and Title](#)

Google Scholar: [Author Only](#) [Title Only](#) [Author and Title](#)

Ryu CM, Anand A, Kang L, Mysore KS (2004) Agrodrench: a novel and effective agroinoculation method for virus-induced gene silencing in roots and diverse Solanaceous species. *The Plant Journal* 40: 322-331

Pubmed: [Author and Title](#)

Google Scholar: [Author Only](#) [Title Only](#) [Author and Title](#)

Sempere RN, Gómez P, Truniger V, Aranda MA (2011) Development of expression vectors based on pepino mosaic virus. *Plant Methods* 7: 6

Pubmed: [Author and Title](#)

Google Scholar: [Author Only](#) [Title Only](#) [Author and Title](#)

Senthil-Kumar M, Mysore KS (2011) New dimensions for VIGS in plant functional genomics. *Trends in plant science* 16: 656-665

Pubmed: [Author and Title](#)

Google Scholar: [Author Only](#) [Title Only](#) [Author and Title](#)

Teoh P-G, Ooi A-S, AbuBakar S, Othman RY (2009) Virus-specific read-through codon preference affects infectivity of chimeric cucumber green mottle mosaic viruses displaying a dengue virus epitope. *BioMed Research International* 2009

Pubmed: [Author and Title](#)

Google Scholar: [Author Only](#) [Title Only](#) [Author and Title](#)

Tran HH, Chen B, Chen H, Menassa R, Hao X, Bernards M, Hüner NP, Wang A (2019) Development of a cucumber green mottle mosaic virus-based expression vector for the production in cucumber of neutralizing epitopes against a devastating animal virus. *Journal of virological methods* 269: 18-25

Pubmed: [Author and Title](#)

Google Scholar: [Author Only](#) [Title Only](#) [Author and Title](#)

Ugaki M, Tomiyama M, Kakutani T, Hidaka S, Kiguchi T, Nagata R, Sato T, Motoyoshi F, Nishiguchi M (1991) The complete nucleotide sequence of cucumber green mottle mosaic virus (SH strain) genomic RNA. *Journal of General Virology* 72: 1487-1495

Pubmed: [Author and Title](#)

Google Scholar: [Author Only](#) [Title Only](#) [Author and Title](#)

Wang R, Yang X, Wang N, Liu X, Nelson RS, Li W, Fan Z, Zhou T (2016) An efficient virus-induced gene silencing vector for maize functional genomics research. *The Plant Journal* 86: 102-115

Pubmed: [Author and Title](#)

Google Scholar: [Author Only](#) [Title Only](#) [Author and Title](#)

Zhang C, Bradshaw JD, Whitham SA, Hill JH (2010) The development of an efficient multipurpose bean pod mottle virus viral vector set for foreign gene expression and RNA silencing. *Plant physiology* 153: 52-65

Pubmed: [Author and Title](#)

Google Scholar: [Author Only](#) [Title Only](#) [Author and Title](#)

Zhang Z, Wang J, Zhang R, Huang R (2012) The ethylene response factor AtERF98 enhances tolerance to salt through the



**transcriptional activation of ascorbic acid synthesis in Arabidopsis. The Plant Journal 71: 273-287**

Pubmed: [Author and Title](#)

Google Scholar: [Author Only](#) [Title Only](#) [Author and Title](#)

**Zhao F, Lim S, Igori D, Yoo RH, Kwon S-Y, Moon JS (2016) Development of tobacco ringspot virus-based vectors for foreign gene expression and virus-induced gene silencing in a variety of plants. Virology 492: 166-178**

Pubmed: [Author and Title](#)

Google Scholar: [Author Only](#) [Title Only](#) [Author and Title](#)

**Zheng H, Xiao C, Han K, Peng J, Lin L, Lu Y, Xie L, Wu X, Xu P, Li G (2015) Development of an agroinoculation system for full-length and GFP-tagged cDNA clones of cucumber green mottle mosaic virus. Archives of virology 160: 2867-2872**

Pubmed: [Author and Title](#)

Google Scholar: [Author Only](#) [Title Only](#) [Author and Title](#)

**Zheng Y, Wu S, Bai Y, Sun H, Jiao C, Guo S, Zhao K, Blanca J, Zhang Z, Huang S (2019) Cucurbit Genomics Database (CuGenDB): a central portal for comparative and functional genomics of cucurbit crops. Nucleic acids research 47: D1128-D1136**

Pubmed: [Author and Title](#)

Google Scholar: [Author Only](#) [Title Only](#) [Author and Title](#)
